# Supplementary material for: Identification of Novel Genomic Regions for Bacterial Leaf Pustule (BLP) Resistance in Soybean (Glycine max L.) via Integrating Linkage Mapping and Association Analysis
Source: MDPI journal article supplement (doi:10.3390/ijms23042113), 2022-02-14
Supplement: s1 [file s1]

**Supplemental Information – Zhao et al. Identification of novel genomic regions for bacterial leaf pustule (BLP) resistance in soybean (*Glycine max* L.) via integrating linkage mapping and association analysis**

**Table S1. BLP resistance in the soybean RIL population following the artificial inoculation with Xag C5 strain**

| S. No. | Lines  | 2014JP | 2015JP | S. No. | Lines  | 2014JP | 2015JP | S. No. | Lines  | 2014JP | 2015JP |
|--------|--------|--------|--------|--------|--------|--------|--------|--------|--------|--------|--------|
|        |        | –spray | –spray |        |        | –spray | –spray |        |        | –spray | –spray |
| 1      | RIL_1  | 5.00   | 1.00   | 15     | RIL_15 | 7.33   | 8.00   | 29     | RIL_29 | 8.00   | 6.00   |
| 2      | RIL_2  | 9.00   | 4.00   | 16     | RIL_16 | 4.00   | 1.00   | 30     | RIL_30 | 9.00   | 9.00   |
| 3      | RIL_3  | 9.00   | 7.00   | 17     | RIL_17 | 4.00   | 1.00   | 31     | RIL_31 | 7.33   | 3.00   |
| 4      | RIL_4  | 7.67   | 2.00   | 18     | RIL_18 | 9.00   | 6.00   | 32     | RIL_32 | 8.00   | 8.00   |
| 5      | RIL_5  | 7.00   | 4.33   | 19     | RIL_19 | 6.11   | 3.00   | 33     | RIL_33 | 7.00   | 9.00   |
| 6      | RIL_6  | 7.00   | 5.11   | 20     | RIL_20 | 7.00   | 1.00   | 34     | RIL_34 | 9.00   | 8.00   |
| 7      | RIL_7  | 2.00   | 4.56   | 21     | RIL_21 | 4.00   | 2.00   | 35     | RIL_35 | 8.00   | 4.33   |
| 8      | RIL_8  | 1.33   | 3.00   | 22     | RIL_22 | 9.00   | 8.00   | 36     | RIL_36 | 8.00   | +      |
| 9      | RIL_9  | 2.00   | 2.33   | 23     | RIL_23 | 2.00   | 1.00   | 37     | RIL_37 | 9.00   | 4.33   |
| 10     | RIL_10 | 8.00   | 7.00   | 24     | RIL_24 | 8.00   | 1.00   | 38     | RIL_38 | 7.00   | 9.00   |
| 11     | RIL_11 | 1.67   | 3.00   | 25     | RIL_25 | 1.00   | 1.00   | 39     | RIL_39 | 3.00   | 1.00   |
| 12     | RIL_12 | 3.00   | 1.00   | 26     | RIL_26 | 7.00   | 2.00   | 40     | RIL_40 | 9.00   | 5.00   |
| 13     | RIL_13 | 8.11   | 6.22   | 27     | RIL_27 | 2.67   | 1.00   | 41     | RIL_41 | 2.00   | 1.00   |
| 14     | RIL_14 | 1.00   | 1.00   | 28     | RIL_28 | 1.00   | 1.00   | 42     | RIL_42 | 3.00   | 2.00   |

**Table S1. (Cont.)**

| S. No. | Lines  | 2014JP | 2015JP | S. No. | Lines  | 2014JP | 2015JP | S. No. | Lines  | 2014JP | 2015JP |
|--------|--------|--------|--------|--------|--------|--------|--------|--------|--------|--------|--------|
|        |        | –spray | –spray |        |        | –spray | –spray |        |        | –spray | –spray |
| 43     | RIL_43 | 6.67   | 7.00   | 60     | RIL_60 | 3.00   | 1.00   | 77     | RIL_77 | 8.00   | 8.00   |
| 44     | RIL_44 | 2.00   | 4.00   | 61     | RIL_61 | 5.33   | 1.00   | 78     | RIL_78 | 2.00   | 2.00   |
| 45     | RIL_45 | 2.00   | 4.00   | 62     | RIL_62 | 2.00   | 2.00   | 79     | RIL_79 | 8.00   | 8.00   |
| 46     | RIL_46 | 6.00   | 4.00   | 63     | RIL_63 | 7.00   | 6.00   | 80     | RIL_80 | 3.00   | 2.00   |
| 47     | RIL_47 | 2.00   | 5.00   | 64     | RIL_64 | 8.00   | 8.00   | 81     | RIL_81 | 6.22   | 5.00   |
| 48     | RIL_48 | 2.67   | 1.00   | 65     | RIL_65 | 7.78   | 6.00   | 82     | RIL_82 | 3.00   | 2.00   |
| 49     | RIL_49 | 3.00   | 1.00   | 66     | RIL_66 | 4.00   | 2.00   | 83     | RIL_83 | 7.00   | 7.67   |
| 50     | RIL_50 | 9.00   | 7.00   | 67     | RIL_67 | 8.00   | 2.00   | 84     | RIL_84 | 7.67   | 5.00   |
| 51     | RIL_51 | 7.00   | 6.00   | 68     | RIL_68 | 8.00   | 5.89   | 85     | RIL_85 | 3.00   | 1.00   |
| 52     | RIL_52 | 5.00   | 2.00   | 69     | RIL_69 | 2.00   | 1.00   | 86     | RIL_86 | 4.00   | 1.00   |
| 53     | RIL_53 | 9.00   | 5.00   | 70     | RIL_70 | 2.00   | 2.00   | 87     | RIL_87 | 8.00   | 7.00   |
| 54     | RIL_54 | 8.22   | 7.33   | 71     | RIL_71 | 2.00   | 1.00   | 88     | RIL_88 | 7.00   | 5.00   |
| 55     | RIL_55 | 9.00   | 6.00   | 72     | RIL_72 | 6.00   | 9.00   | 89     | RIL_89 | 3.00   | 1.00   |
| 56     | RIL_56 | 8.00   | 8.00   | 73     | RIL_73 | 6.00   | 1.00   | 90     | RIL_90 | 5.00   | 1.00   |
| 57     | RIL_57 | 2.00   | 1.00   | 74     | RIL_74 | 3.33   | 1.00   | 91     | RIL_91 | 2.00   | 3.00   |
| 58     | RIL_58 | 8.00   | 6.67   | 75     | RIL_75 | 2.00   | 1.00   | 92     | RIL_92 | 5.00   | 3.00   |
| 59     | RIL_59 | 9.00   | 8.00   | 76     | RIL_76 | 5.22   | 4.67   | 93     | RIL_93 | 7.22   | 7.00   |

**Table S1. (Cont.)**

| S. No. | Lines   | 2014JP | 2015JP | S. No. | Lines   | 2014JP | 2015JP | S. No. | Lines   | 2014JP | 2015JP |
|--------|---------|--------|--------|--------|---------|--------|--------|--------|---------|--------|--------|
|        |         | –spray | –spray |        |         | –spray | –spray |        |         | –spray | –spray |
| 94     | RIL_94  | 7.11   | 3.00   | 105    | RIL_105 | 7.00   | 1.00   | 116    | RIL_116 | 6.00   | 2.67   |
| 95     | RIL_95  | 9.00   | 5.67   | 106    | RIL_106 | 8.00   | 6.00   | 117    | RIL_117 | 4.00   | 2.00   |
| 96     | RIL_96  | 6.67   | 5.00   | 107    | RIL_107 | 9.00   | 7.00   | 118    | RIL_118 | 5.11   | 5.67   |
| 97     | RIL_97  | 8.00   | 2.00   | 108    | RIL_108 | 5.00   | 1.00   | 119    | RIL_119 | 1.00   | 1.00   |
| 98     | RIL_98  | 9.00   | 7.00   | 109    | RIL_109 | 3.00   | 1.00   | 120    | RIL_120 | 7.22   | 1.00   |
| 99     | RIL_99  | 6.67   | 4.67   | 110    | RIL_110 | 6.00   | 8.00   | 121    | RIL_121 | 7.00   | 8.33   |
| 100    | RIL_100 | 7.00   | 7.00   | 111    | RIL_111 | 9.00   | 4.00   | 122    | RIL_122 | 3.00   | 2.00   |
| 101    | RIL_101 | 2.00   | 1.00   | 112    | RIL_112 | 5.00   | 7.67   | 123    | RIL_123 | 8.00   | 7.00   |
| 102    | RIL_102 | 8.00   | 9.00   | 113    | RIL_113 | 9.00   | 4.00   | 124    | RIL_124 | 3.00   | 3.22   |
| 103    | RIL_103 | 9.00   | 6.00   | 114    | RIL_114 | 5.00   | 4.33   | 125    | RIL_125 | 6.67   | 6.00   |
| 104    | RIL_104 | 8.00   | 5.00   | 115    | RIL_115 | 3.00   | 1.00   | 126    | RIL_126 | 1.00   | 1.00   |

**Table S2. BLP resistance in the soybean association panel under the artificial inoculation with Xag C5 strain**

| S. No. | Lines                      | 2014JP–spray | 2015JP–spray | 2016JP–spray |
|--------|----------------------------|--------------|--------------|--------------|
| 1      | 94-14//chu/zhou-2          | 6.00         | 7.22         | 7.00         |
| 2      | 94-14//chu/zhou            | 1.00         | 7.00         | 3.00         |
| 3      | T119-1                     | 3.00         | 8.00         | 5.67         |
| 4      | tongzhoudou（cai5）          | 7.00         | 4.00         | 1.67         |
| 5      | xin/tong-2                 | 1.00         | 7.33         | 4.00         |
| 6      | tongzhoudou/tong 4219-1 B2 | 9.00         | 7.00         | 3.00         |
| 7      | tongzhoudou/4219-1 F2      | 5.00         | 7.67         | 4.33         |
| 8      | tong/f（1）                  | 4.00         | 7.56         | 4.33         |
| 9      | msb×T·fs                   | 4.00         | 1.00         | 5.00         |
| 10     | T890840                    | 6.00         | 6.00         | 7.00         |
| 11     | T890844                    | 7.00         | 5.00         | 1.00         |
| 12     | tong 4219B2-4 B2           | 5.00         | 4.00         | 3.00         |
| 13     | tong/ai-1                  | 7.00         | 6.22         | 3.67         |
| 14     | 118×tieye                  | 8.00         | 7.00         | 5.00         |
| 15     | 94-14×T790659-2            | 6.00         | 1.00         | 2.33         |
| 16     | tong/si2（1）                | 6.00         | 5.33         | 2.00         |
| 17     | tong/si2（2）                | 5.00         | 4.11         | 4.33         |
| 18     | R19/tong（1）                | 7.00         | 3.00         | 2.33         |

**Table S2. (Cont.)**

| S. No. | Lines                | 2014JP–spray | 2015JP–spray | 2016JP–spray |
|--------|----------------------|--------------|--------------|--------------|
| 19     | 86-4/fengbaimu (1)   | 2.00         | 2.67         | 4.33         |
| 20     | R19/tong (2)         | 3.00         | 3.22         | 3.00         |
| 21     | 118F6/zhou92029-2    | 4.00         | 9.00         | 5.67         |
| 22     | liufeng/taiwan75 (1) | 3.00         | 1.00         | 1.67         |
| 23     | liufeng              | 3.00         | 2.00         | 2.33         |
| 24     | you4/5545-1          | 3.00         | 1.00         | 1.00         |
| 25     | liufeng/taiwan75-2   | 5.00         | 4.00         | 1.67         |
| 26     | 94-16/IA2077         | 5.00         | 4.00         | 3.00         |
| 27     | 94-16/IA2077-5       | 2.00         | 2.00         | 1.00         |
| 28     | b23[94-16/HD (1)     | 3.00         | 2.67         | 1.67         |
| 29     | b23[94-16/HD (2)     | 6.00         | 1.00         | 1.00         |
| 30     | b23[94-16/HD (3)     | 4.00         | 1.00         | 1.00         |
| 31     | b23-1[94-16/HD       | 4.00         | 1.67         | 3.00         |
| 32     | 94-14                | 3.00         | 1.67         | 2.00         |
| 33     | 94-14/shanning111    | 5.00         | 6.00         | 2.33         |
| 34     | 94-16                | 3.00         | 1.00         | 1.00         |
| 35     | 118/jidou7 (1)       | 2.00         | 4.67         | 4.33         |
| 36     | 118/jidou7-3 (1)     | 4.00         | 3.33         | 3.00         |

**Table S2. (Cont.)**

| S. No. | Lines            | 2014JP–spray | 2015JP–spray | 2016JP–spray |
|--------|------------------|--------------|--------------|--------------|
| 37     | 118/jidou7-1 (1) | 4.00         | 4.00         | 3.67         |
| 38     | 118/jidou7-3 (2) | 7.00         | 4.00         | 2.33         |
| 39     | 118/jidou7-2     | 5.00         | 4.00         | 2.33         |
| 40     | 118/jidou7 (2)   | 4.00         | 4.00         | 4.33         |
| 41     | 118/OT94-47-3    | 1.00         | 4.00         | 3.00         |
| 42     | 94-14/NJ16-67    | 6.00         | 7.00         | 3.67         |
| 43     | tong/tai (1)     | 2.00         | 9.00         | 6.00         |
| 44     | tong/tai (2)     | 4.00         | 7.33         | 5.00         |
| 45     | tong/tai (3)     | 3.00         | 7.00         | 3.00         |
| 46     | tong/tai (4)     | 3.00         | 7.00         | 3.00         |
| 47     | liufeng/USP-1    | 3.00         | 1.00         | 2.33         |
| 48     | usp/118 (1)      | 3.00         | 2.00         | 2.33         |
| 49     | usp/118 (2)      | 4.00         | 2.00         | 2.33         |
| 50     | USP//tong/chu-4  | 5.00         | 2.00         | 1.67         |
| 51     | chuxiu           | 3.00         | 2.00         | 2.33         |
| 52     | liufeng/USP-4    | 3.00         | 3.22         | 3.00         |
| 53     | 118/hei26 (1)    | 4.00         | 1.00         | 5.00         |
| 54     | 88-48/T173 (1)   | 4.00         | 2.00         | 2.33         |

**Table S2. (Cont.)**

| S. No. | Lines               | 2014JP–spray | 2015JP–spray | 2016JP–spray |
|--------|---------------------|--------------|--------------|--------------|
| 55     | liufeng/USP (1)     | 5.00         | 2.67         | 3.00         |
| 56     | ZS07301×shanning12  | 4.00         | 1.00         | 1.67         |
| 57     | liufeng/USP-2       | 3.00         | 1.00         | 1.00         |
| 58     | liufeng/USP (2)     | 5.00         | 3.11         | 1.67         |
| 59     | ai/118-3 (1)        | 2.00         | 5.67         | 1.67         |
| 60     | ai/118              | 2.00         | 1.00         | 2.33         |
| 61     | ai/118-1            | 6.00         | 3.00         | 2.33         |
| 62     | 94-14/2032-1 (1)    | 3.00         | 4.00         | 3.00         |
| 63     | 94-14/2032-1 (2)    | 5.00         | 3.00         | 5.00         |
| 64     | 118/hei26 (2)       | 3.00         | 5.00         | 4.33         |
| 65     | TY/NT-1 (1)         | 7.00         | 5.11         | 2.00         |
| 66     | 94-16/ji31 (1)      | 4.00         | 4.33         | 3.00         |
| 67     | tong/hei26-1        | 4.00         | 5.00         | 7.00         |
| 68     | tong/hei26          | 9.00         | 6.00         | 5.00         |
| 69     | tong/hei8           | 4.00         | 9.00         | 6.33         |
| 70     | tong/U95-5390       | 2.00         | 2.00         | 2.33         |
| 71     | 86-4/huaidou2hao(4) | 4.00         | 3.00         | 2.00         |
| 72     | 118J7/yFR(1)        | 4.00         | 6.67         | 3.67         |

**Table S2. (Cont.)**

| S. No. | Lines              | 2014JP–spray | 2015JP–spray | 2016JP–spray |
|--------|--------------------|--------------|--------------|--------------|
| 73     | 118J7/yFR(8)       | 6.00         | 6.33         | 3.67         |
| 74     | 118J7/yFR(2)       | 5.00         | 5.00         | 3.00         |
| 75     | 118J7/yFR(3)       | 6.00         | 5.00         | 3.67         |
| 76     | 118J7/yFR(4)       | 4.00         | 5.00         | 3.00         |
| 77     | 118J7/yFR(5)       | 9.00         | 3.22         | 2.33         |
| 78     | 118J7/yFR(6)       | 6.00         | 3.00         | 3.00         |
| 79     | 118J7/yFR(7)       | 4.00         | 4.00         | 3.00         |
| 80     | 118/hefeng35-2 (1) | 6.00         | 3.67         | 5.00         |
| 81     | 118/hefeng35-2 (2) | 2.00         | 3.67         | 3.67         |
| 82     | lu2/xiang//tong    | 3.00         | 5.00         | 3.67         |
| 83     | tong/hefeng35-1    | 4.00         | 7.00         | 4.00         |
| 84     | tong/hei8-2 (1)    | 3.00         | 8.00         | 5.67         |
| 85     | tong/hei8-2 (2)    | 1.00         | 6.00         | 3.67         |
| 86     | 94-14/shanning 11  | 6.00         | 4.00         | 4.33         |
| 87     | 94-14/dongxin 202  | 4.00         | 7.00         | 4.33         |
| 88     | 94-16/N2899        | 3.00         | 1.00         | 1.00         |
| 89     | 94-16/N2899(1)     | 3.00         | 5.00         | 2.33         |
| 90     | 94-16×2899         | 4.00         | 3.00         | 4.33         |



Table S2. (Cont.)

| S. No. | Lines             | 2014JP–spray | 2015JP–spray | 2016JP–spray |
|--------|-------------------|--------------|--------------|--------------|
| 91     | 86-4/zhongzuo (1) | 3.00         | 6.67         | 3.00         |
| 92     | 86-4/zhongzuo (2) | 3.00         | 4.00         | 2.33         |
| 93     | NIL91-1N/you4     | 1.00         | 5.33         | 3.00         |
| 94     | NIL91-N/you4 (1)  | 4.00         | 4.44         | 5.67         |
| 95     | NIL91-N/you4 (2)  | 6.00         | 4.00         | 2.33         |
| 96     | jinda74/NN99-10   | 2.00         | 2.00         | 2.33         |
| 97     | jinda74×99-10     | 4.00         | 1.00         | 2.33         |
| 98     | 86-4/sb (1)       | 6.00         | 7.00         | 3.00         |
| 99     | 7241/86-4 (1)     | 3.00         | 1.00         | 1.67         |
| 100    | 1138/W82          | 2.00         | 1.00         | 1.00         |
| 101    | TP5×1138-2-1      | 3.00         | 3.00         | 1.00         |
| 102    | sp//zi/you4///sp  | 1.00         | 6.67         | 4.33         |
| 103    | dongxin3hao       | 4.00         | 1.00         | 1.67         |
| 104    | sb/jin74//9910    | 3.00         | 6.33         | 3.67         |
| 105    | you/sb-1          | 1.00         | 5.56         | 2.33         |
| 106    | you4/sb           | 2.00         | 7.00         | 3.00         |
| 107    | shanxiye×agh-5    | 2.00         | 5.67         | 2.33         |
| 108    | NG94-156          | 4.00         | 6.00         | 5.67         |

Table S2. (Cont.)

| S. No. | Lines                 | 2014JP–spray | 2015JP–spray | 2016JP–spray |
|--------|-----------------------|--------------|--------------|--------------|
| 109    | 88-48/4690 (1)        | 5.00         | 3.00         | 5.00         |
| 110    | 94-16/863070-D36      | 4.00         | 2.00         | 1.67         |
| 111    | 94-14/zhongzuo97-1121 | 3.00         | 1.67         | 2.00         |
| 112    | NG4690                | 1.00         | 9.00         | 5.00         |
| 113    | nannong86--4          | 4.00         | 1.00         | 1.00         |
| 114    | 86-4/huaidou2hao(3)   | 5.00         | 2.00         | 3.67         |
| 115    | t821058               | 4.00         | 1.00         | 1.67         |
| 116    | t821096               | 1.00         | 1.00         | 1.00         |
| 117    | T821069               | 5.00         | 1.00         | 1.00         |
| 118    | T821060               | 4.00         | 2.00         | 1.00         |
| 119    | t821082               | 1.00         | 1.00         | 1.67         |
| 120    | 86-4/huaidou2hao(1)   | 5.00         | 2.00         | 2.33         |
| 121    | 86-4/huaidou2hao(2)   | 4.00         | 1.00         | 3.00         |
| 122    | 86-4/Dsp-2            | 1.00         | 1.00         | 1.00         |
| 123    | 86-4/sp               | 1.00         | 1.00         | 1.67         |
| 124    | 86-4/sp2 (1)          | 4.00         | 1.00         | 1.67         |
| 125    | 86-4/RLFI (1)         | 2.00         | 1.33         | 1.00         |
| 126    | 86-4/xiang//87-23 (1) | 2.00         | 1.00         | 1.00         |

Table S2. (Cont.)

| S. No. | Lines                  | 2014JP–spray | 2015JP–spray | 2016JP–spray |
|--------|------------------------|--------------|--------------|--------------|
| 127    | 493-1/you4-2           | 4.00         | 3.00         | 1.00         |
| 128    | 86-4/RLFI (2)          | 1.00         | 1.00         | 1.67         |
| 129    | 86-4/sp-2              | 3.00         | 2.11         | 3.00         |
| 130    | 86-4/Sp (1)            | 4.00         | 1.00         | 1.67         |
| 131    | 86-4/Sp (2)            | 5.00         | 1.00         | 1.67         |
| 132    | 86-4/sp2 (2)           | 2.00         | 2.00         | 1.00         |
| 133    | 86-4/tongzhoudou       | 1.00         | 8.00         | 4.33         |
| 134    | 7241/86-4 (2)          | 3.00         | 1.00         | 1.67         |
| 135    | zhe/118 (1)            | 7.00         | 3.00         | 1.67         |
| 136    | zhe/118-2              | 5.00         | 3.33         | 1.00         |
| 137    | nannong87-17           | 2.00         | 3.00         | 4.33         |
| 138    | nannong33 (nannong513) | 5.00         | 7.00         | 4.33         |
| 139    | 86-4/NH5               | 5.00         | 1.00         | 1.00         |
| 140    | 86-4/RLFI2             | 1.00         | 1.00         | 1.67         |
| 141    | 86-4/Rlfi2-2           | 1.00         | 2.00         | 1.67         |
| 142    | 86-4/7424F2-19 (1)     | 6.00         | 6.00         | 5.00         |
| 143    | 86-4/7424F2-1          | 5.00         | 4.00         | 5.67         |
| 144    | 86-4/7424F2-19 (2)     | 4.00         | 1.00         | 1.00         |

**Table S2. (Cont.)**

| <b>S. No.</b> | <b>Lines</b>      | <b>2014JP–spray</b> | <b>2015JP–spray</b> | <b>2016JP–spray</b> |
|---------------|-------------------|---------------------|---------------------|---------------------|
| 145           | 86-4/you4 (1)     | 6.00                | 1.00                | 1.67                |
| 146           | 88-48/AGH (1)     | 1.00                | 1.00                | 1.67                |
| 147           | 86-4/you4 (2)     | 2.00                | 2.33                | 1.67                |
| 148           | 86-4/you4 (3)     | 2.00                | 3.00                | 3.00                |
| 149           | 22225/86-4 (1)    | 2.00                | 1.00                | 1.00                |
| 150           | H5050/86-4 (1)    | 3.00                | 4.00                | 1.00                |
| 151           | H5050/86-4 (2)    | 1.00                | 5.00                | 1.00                |
| 152           | tong/hefeng35 (1) | 3.00                | 2.00                | 1.00                |
| 153           | 90L-2/tong        | 3.00                | 2.00                | 1.67                |
| 154           | NN8-4/Forrest     | 1.00                | 1.00                | 1.67                |
| 155           | 88-48/Sp          | 4.00                | 1.00                | 1.67                |
| 156           | 86-4/nh5 (1)      | 3.00                | 1.00                | 1.00                |
| 157           | 86-4/Vance-1 (1)  | 1.00                | 1.00                | 1.00                |
| 158           | 86-4/Vance-2      | 4.00                | 1.00                | 1.00                |
| 159           | 86-4/Vance (1)    | 3.00                | 1.00                | 1.67                |
| 160           | 86-4/Vance (2)    | 2.00                | 1.00                | 1.67                |
| 161           | 86-4/Vance-1 (2)  | 4.00                | 1.00                | 2.33                |
| 162           | 86-4/Vance (3)    | 2.00                | 1.00                | 2.33                |

**Table S2. (Cont.)**

| S. No. | Lines                | 2014JP–spray | 2015JP–spray | 2016JP–spray |
|--------|----------------------|--------------|--------------|--------------|
| 163    | you96-5×Vance        | 4.00         | 1.00         | 2.33         |
| 164    | 73-932/zao18-1       | 3.00         | 3.11         | 2.33         |
| 165    | 73932×zao18          | 4.00         | 3.00         | 3.67         |
| 166    | nannong73-935        | 7.00         | 5.00         | 3.00         |
| 167    | 73-932               | 7.00         | 4.00         | 3.00         |
| 168    | 73-935/6255 (1)      | 2.00         | 1.33         | 1.67         |
| 169    | 73-932/6255-2        | 5.00         | 2.00         | 3.00         |
| 170    | 73-935/6255 (2)      | 1.00         | 1.00         | 1.00         |
| 171    | 73-935/6255 (3)      | 7.00         | 1.00         | 3.00         |
| 172    | 73-935×M9449         | 5.00         | 5.00         | 2.33         |
| 173    | 73-935×Z0102         | 4.00         | 5.22         | 2.00         |
| 174    | nannong493-1         | 3.00         | 3.33         | 1.67         |
| 175    | 8831/you4//73935 (1) | 4.00         | 1.67         | 3.67         |
| 176    | 8831/you4//73935 (2) | 4.00         | 2.00         | 1.67         |
| 177    | (Y4×88-31) ×73-935   | 6.00         | 2.00         | 1.00         |
| 178    | chu//nan/you-2       | 9.00         | 6.00         | 3.67         |
| 179    | 83-19                | 6.00         | 4.67         | 3.00         |
| 180    | 118/hefeng25         | 4.00         | 7.00         | 3.00         |

**Table S2. (Cont.)**

| S. No. | Lines               | 2014JP–spray | 2015JP–spray | 2016JP–spray |
|--------|---------------------|--------------|--------------|--------------|
| 181    | you×（88-31×73-935）  | 2.00         | 1.00         | 1.67         |
| 182    | you/88-31//73-935   | 1.00         | 4.56         | 3.00         |
| 183    | youchun96-4/86-4（1） | 5.00         | 1.00         | 3.00         |
| 184    | youchun96-4/86-4（2） | 3.00         | 2.00         | 2.33         |
| 185    | youchun96-4/86-4（3） | 3.00         | 1.67         | 1.00         |
| 186    | HL05                | 4.00         | 1.00         | 1.00         |
| 187    | 86-4/fengbaimu（2）   | 3.00         | 1.00         | 1.67         |
| 188    | 86-4/fengbaimu（3）   | 9.00         | 5.00         | 1.00         |
| 189    | you94-412/86-4      | 1.00         | 9.00         | 6.33         |
| 190    | 86-4/242(1)         | 5.00         | 3.00         | 2.33         |
| 191    | 86-4/242(2)         | 4.00         | 3.00         | 2.33         |
| 192    | 86-4/242(4)         | 6.00         | 3.00         | 4.33         |
| 193    | 86-4/242(5)         | 3.00         | 6.00         | 5.67         |
| 194    | 86-4/242(8)         | 3.00         | 5.00         | 3.67         |
| 195    | 86-4/242(6)         | 5.00         | 1.00         | 1.00         |
| 196    | 86-4/242(7)         | 4.00         | 6.00         | 5.00         |
| 197    | 86-4/242(10)        | 3.00         | 8.00         | 7.00         |
| 198    | 86-4/242(12)        | 3.00         | 3.00         | 3.00         |

**Table S2. (Cont.)**

| S. No. | Lines                | 2014JP–spray | 2015JP–spray | 2016JP–spray |
|--------|----------------------|--------------|--------------|--------------|
| 199    | 86-4/242(11)         | 4.00         | 7.00         | 5.67         |
| 200    | cs1F/86-4 (1)        | 7.00         | 1.67         | 1.67         |
| 201    | cs1F/86-4 (2)        | 3.00         | 3.22         | 1.67         |
| 202    | cs1F/86-4 (3)        | 2.00         | 3.67         | 3.00         |
| 203    | cs1F/86-4 (4)        | 5.00         | 3.00         | 3.00         |
| 204    | cs1F/86-4 (5)        | 3.00         | 3.67         | 1.00         |
| 205    | 7241/86-4 (3)        | 3.00         | 3.22         | 5.00         |
| 206    | 86-4/sb (2)          | 6.00         | 1.00         | 1.00         |
| 207    | 7241/86-4 (4)        | 2.00         | 7.00         | 3.00         |
| 208    | 73-935//90L-2/ye (1) | 3.00         | 9.00         | 5.00         |
| 209    | 73-935//90L-2/ye (2) | 4.00         | 9.00         | 5.00         |
| 210    | 73-935//90L-2/ye (3) | 4.00         | 4.67         | 6.33         |
| 211    | (S/y4)F2             | 4.00         | 4.00         | 3.00         |
| 212    | aijiaozao            | 5.00         | 2.00         | 1.00         |
| 213    | aijiaozao/26201 (1)  | 4.00         | 1.00         | 1.67         |
| 214    | aijiaozao/26201 (2)  | 4.00         | 2.00         | 2.33         |
| 215    | aijiaozao/26201 (3)  | 3.00         | 1.00         | 2.33         |
| 216    | youchun96-4/86-4 (4) | 3.00         | 2.33         | 1.00         |

Table S2. (Cont.)

| S. No. | Lines                    | 2014JP–spray | 2015JP–spray | 2016JP–spray |
|--------|--------------------------|--------------|--------------|--------------|
| 217    | nannong502 (nannong32)   | 2.00         | 2.11         | 1.67         |
| 218    | nannong99-10             | 4.00         | 3.00         | 1.00         |
| 219    | tongdou2006              | 5.00         | 2.67         | 1.67         |
| 220    | 86-4/xiang               | 7.00         | 5.00         | 6.33         |
| 221    | CT-5                     | 1.00         | 8.00         | 5.00         |
| 222    | xiangshuidou             | 8.00         | 7.00         | 4.00         |
| 223    | chudou1hao               | 4.00         | 3.00         | 1.67         |
| 224    | suxian21                 | 5.00         | 1.00         | 3.00         |
| 225    | caidou6hao               | 5.00         | 2.00         | 1.00         |
| 226    | 412785-1×Y4              | 7.00         | 6.22         | 3.67         |
| 227    | suxian19                 | 1.00         | 1.00         | 2.00         |
| 228    | 88-31t                   | 6.00         | 1.00         | 1.00         |
| 229    | ai/118-3 (2)             | 2.00         | 1.00         | 1.00         |
| 230    | tongdou7hao              | 4.00         | 5.00         | 2.33         |
| 231    | nannong88-31             | 6.00         | 4.11         | 1.67         |
| 232    | 88-31× (88-31×4985)      | 4.00         | 2.00         | 1.67         |
| 233    | 88-31× (88-31×4985) bao1 | 9.00         | 2.00         | 1.00         |
| 234    | Y96-3× (Y4×88-31) (1)    | 4.00         | 1.00         | 1.00         |



Table S2. (Cont.)

| S. No. | Lines                 | 2014JP–spray | 2015JP–spray | 2016JP–spray |
|--------|-----------------------|--------------|--------------|--------------|
| 235    | you94-412             | 3.00         | 5.33         | 2.33         |
| 236    | USP90-2               | 4.00         | 5.00         | 4.33         |
| 237    | qingpidou×N2899       | 4.00         | 6.00         | 3.67         |
| 238    | CS1×fengdouFS         | 5.00         | 3.00         | 1.00         |
| 239    | CS1×yu16              | 3.00         | 4.11         | 3.00         |
| 240    | 88-48×P1 (1)          | 4.00         | 6.67         | 4.33         |
| 241    | 118/jidou4-3          | 5.00         | 1.00         | 1.00         |
| 242    | 118/jidou4-4          | 5.00         | 3.67         | 3.00         |
| 243    | 118J4/xiangyou        | 7.00         | 5.00         | 1.67         |
| 244    | 118/jidou7-1 (2)      | 5.00         | 5.00         | 4.33         |
| 245    | 118/jidou7 (3)        | 7.00         | 4.33         | 3.67         |
| 246    | HD/94-16              | 4.00         | 3.89         | 3.67         |
| 247    | V97-6490B/95C-13      | 4.00         | 1.00         | 1.00         |
| 248    | sp//493-1/you (1)     | 1.00         | 1.00         | 4.33         |
| 249    | 88-48/T173 (2)        | 4.00         | 8.00         | 4.00         |
| 250    | Lar.r×36118           | 4.00         | 8.00         | 5.00         |
| 251    | xin/tong              | 4.00         | 9.00         | 6.33         |
| 252    | N/(xiang / 88-48) (1) | 1.00         | 8.00         | 6.33         |

Table S2. (Cont.)

| S. No. | Lines                 | 2014JP–spray | 2015JP–spray | 2016JP–spray |
|--------|-----------------------|--------------|--------------|--------------|
| 253    | N/(xiang / 88-48) (2) | 1.00         | 6.00         | 3.00         |
| 254    | N/(xiang/88-48)       | 4.00         | 2.44         | 3.00         |
| 255    | 22033×69-3            | 2.00         | 5.00         | 6.33         |
| 256    | 88-48/SP              | 6.00         | 8.00         | 8.00         |
| 257    | nannong88-48          | 3.00         | 1.00         | 1.67         |
| 258    | 88-48y                | 3.00         | 6.00         | 3.00         |
| 259    | 88-48/sb-f-p1-1       | 3.00         | 3.00         | 2.33         |
| 260    | 88-48×P1 (2)          | 5.00         | 3.67         | 5.00         |
| 261    | 88-48/sb-f-P1 (1)     | 3.00         | 5.67         | 6.33         |
| 262    | 88-48/sp-2            | 2.00         | 7.67         | 4.33         |
| 263    | 86-4/nh5 (2)          | 1.00         | 3.67         | 2.33         |
| 264    | 86-4/NT-1 (1)         | 5.00         | 2.00         | 3.00         |
| 265    | 88-48y/86-4y          | 1.00         | 7.00         | 3.67         |
| 266    | N//xiang/88-48        | 5.00         | 4.67         | 1.67         |
| 267    | 88-48/p1 p1dan-1      | 1.00         | 4.00         | 3.00         |
| 268    | NT-1                  | 3.00         | 3.00         | 1.00         |
| 269    | 88-48/f (1)           | 3.00         | 8.00         | 5.67         |
| 270    | 88-48/f (2)           | 3.00         | 7.33         | 6.00         |

Table S2. (Cont.)

| S. No. | Lines                       | 2014JP–spray | 2015JP–spray | 2016JP–spray |
|--------|-----------------------------|--------------|--------------|--------------|
| 271    | 88-48/nt-1--6               | 3.00         | 5.00         | 2.33         |
| 272    | 88-48/agh-2                 | 2.00         | 4.00         | 3.00         |
| 273    | Ty/88-48y-1                 | 1.00         | 6.78         | 5.00         |
| 274    | 88-48//xin/tong             | 5.00         | 5.22         | 1.67         |
| 275    | b94[88-48 yuan/94-16(1)     | 1.00         | 2.33         | 1.67         |
| 276    | b94[88-48 yuan/94-16(2)     | 2.00         | 6.00         | 4.33         |
| 277    | fendou51                    | 5.00         | 6.00         | 6.00         |
| 278    | kefeng1hao                  | 1.00         | 7.00         | 7.00         |
| 279    | fen33/94-5                  | 3.00         | 4.00         | 4.33         |
| 280    | 86-4/21534（1）               | 1.00         | 2.00         | 1.00         |
| 281    | 86-4/N21534                 | 5.00         | 4.67         | 3.00         |
| 282    | jidou7hao                   | 5.00         | 6.00         | 5.00         |
| 283    | IA2077                      | 4.00         | 2.00         | 2.33         |
| 284    | ZS07259×hedou12             | 3.00         | 1.00         | 1.00         |
| 285    | 88-48/agh-1                 | 3.00         | 1.00         | 1.67         |
| 286    | L65-3366-C                  | 2.00         | 2.00         | 3.00         |
| 287    | fuyang434×nannongcaidou5hao | 5.00         | 2.00         | 1.00         |
| 288    | taixingheidou               | 4.00         | 6.00         | 2.33         |

**Table S2. (Cont.)**

| S. No. | Lines             | 2014JP–spray | 2015JP–spray | 2016JP–spray |
|--------|-------------------|--------------|--------------|--------------|
| 289    | jilin31           | 4.00         | 8.00         | 4.33         |
| 290    | you4/Graham       | 1.00         | 1.00         | 1.00         |
| 291    | B295              | 5.00         | 6.33         | 3.00         |
| 292    | Graham            | 3.00         | 1.00         | 1.00         |
| 293    | 22318×5           | 3.00         | 3.00         | 1.67         |
| 294    | taiwan75          | 1.00         | 5.00         | 2.33         |
| 295    | nannong39         | 5.00         | 3.00         | 1.00         |
| 296    | 73-935/6255 (4)   | 2.00         | 2.83         | 1.67         |
| 297    | su1dlm×agh        | 1.00         | 6.89         | 3.00         |
| 298    | vance             | 1.00         | 2.00         | 2.33         |
| 299    | zhongdou20×agh    | 3.00         | 1.00         | 5.00         |
| 300    | tong/hefeng35 (2) | 1.00         | 1.00         | 2.33         |
| 301    | shanxiye×agh-32   | 4.00         | 4.33         | 1.67         |
| 302    | tong/95-5390      | 1.00         | 3.33         | 5.00         |
| 303    | tong×95-5390      | 3.00         | 7.33         | 4.33         |
| 304    | zhe3/118-2-2      | 4.00         | 5.00         | 4.33         |
| 305    | zhe3/118-1-3      | 5.00         | 7.00         | 4.00         |
| 306    | zhe/118 (2)       | 3.00         | 6.00         | 4.33         |

Table S2. (Cont.)

| S. No. | Lines             | 2014JP–spray | 2015JP–spray | 2016JP–spray |
|--------|-------------------|--------------|--------------|--------------|
| 307    | zhe3/118          | 2.00         | 5.67         | 4.33         |
| 308    | zigongdongdou     | 3.00         | 9.00         | 6.33         |
| 309    | zhechun3hao       | 5.00         | 8.22         | 5.00         |
| 310    | you4/AGH          | 1.00         | 3.00         | 1.00         |
| 311    | 118/OT94-57-1(1)  | 3.00         | 3.00         | 2.33         |
| 312    | 118/hefeng35      | 2.00         | 4.67         | 3.67         |
| 313    | 94-16/ji31 (2)    | 1.00         | 2.00         | 1.67         |
| 314    | 94-14//ji/dahuapi | 3.00         | 3.00         | 1.00         |
| 315    | liufeng/you4      | 3.00         | 2.00         | 1.67         |
| 316    | 94-16/p1 (1)      | 3.00         | 1.00         | 1.67         |
| 317    | 94-16/p1 (2)      | 1.00         | 1.00         | 1.67         |
| 318    | 94-16/y4(2)       | 6.00         | 1.00         | 2.33         |
| 319    | 94-16/p1 (3)      | 1.00         | 4.00         | 1.67         |
| 320    | 94-16/p1 (4)      | 3.00         | 2.67         | 2.33         |
| 321    | han/you4 (1)      | 5.00         | 5.78         | 5.00         |
| 322    | han/you (1)       | 8.00         | 4.67         | 5.00         |
| 323    | han/you (2)       | 2.00         | 1.00         | 1.00         |
| 324    | han/you4 (2)      | 1.00         | 2.00         | 2.33         |

**Table S2. (Cont.)**

| S. No. | Lines            | 2014JP–spray | 2015JP–spray | 2016JP–spray |
|--------|------------------|--------------|--------------|--------------|
| 325    | tong/tai (5)     | 4.00         | 1.00         | 4.33         |
| 326    | hanyou           | 1.00         | 3.00         | 3.00         |
| 327    | you/chuhun       | 5.00         | 1.67         | 1.00         |
| 328    | heinong26        | 2.00         | 1.00         | 1.67         |
| 329    | NH5              | 5.00         | 2.00         | 3.67         |
| 330    | you4/ganyu       | 4.00         | 1.00         | 1.00         |
| 331    | you4/5545 (1)    | 5.00         | 1.00         | 1.00         |
| 332    | you4/5545 (2)    | 8.00         | 1.00         | 2.33         |
| 333    | y4/5545          | 3.00         | 1.00         | 1.00         |
| 334    | you4/88-31t-1    | 5.00         | 1.00         | 5.00         |
| 335    | 86-4/you4 (4)    | 7.00         | 3.33         | 1.00         |
| 336    | 86-4/you4 (5)    | 1.00         | 2.00         | 1.67         |
| 337    | zhou92029-2      | 3.00         | 8.00         | 5.00         |
| 338    | 118/OT94-57-1(2) | 3.00         | 5.00         | 3.67         |
| 339    | 118/OT94-57      | 4.00         | 3.00         | 3.00         |
| 340    | 88-48/87-17 (1)  | 4.00         | 3.00         | 1.00         |
| 341    | 88-48/87-17 (2)  | 2.00         | 4.33         | 1.00         |
| 342    | 88-48/87-17 (3)  | 5.00         | 5.22         | 1.67         |

Table S2. (Cont.)

| S. No. | Lines                    | 2014JP–spray | 2015JP–spray | 2016JP–spray |
|--------|--------------------------|--------------|--------------|--------------|
| 343    | 88-48/87-17 (4)          | 5.00         | 4.00         | 2.33         |
| 344    | 88-48/87-17 (5)          | 5.00         | 4.00         | 1.00         |
| 345    | 88-48/RLFI               | 2.00         | 5.67         | 2.33         |
| 346    | 86-4/NT-1 (2)            | 3.00         | 8.00         | 5.00         |
| 347    | 86-4/NT-1 (3)            | 4.00         | 5.78         | 3.00         |
| 348    | 88-48/nanxiong//sb (1)   | 4.00         | 8.00         | 5.00         |
| 349    | 88-48/nanxiong//sb (2)   | 4.00         | 5.00         | 5.00         |
| 350    | 88-48/AGH (2)            | 2.00         | 6.67         | 3.67         |
| 351    | 88-48/21534              | 5.00         | 7.00         | 4.33         |
| 352    | 86-4/tongy               | 4.00         | 9.00         | 5.67         |
| 353    | qihuang1hao×TF-2         | 1.00         | 1.00         | 1.00         |
| 354    | (haixi×SP) ×956251       | 4.00         | 3.22         | 1.67         |
| 355    | 88-48/nanxiong//sb (3)   | 6.00         | 8.00         | 7.00         |
| 356    | 88-48/nanxiong//sb (4)   | 3.00         | 9.00         | 7.67         |
| 357    | nanxionghuangdou         | 5.00         | 8.33         | 7.00         |
| 358    | hanchuanbayuebao         | 3.00         | 6.33         | 3.00         |
| 359    | 88-48/ hanchuanssd-3     | 4.00         | 5.00         | 3.00         |
| 360    | tongshanbaopihuangdoujia | 5.00         | 9.00         | 5.00         |

**Table S2. (Cont.)**

| S. No. | Lines                 | 2014JP–spray | 2015JP–spray | 2016JP–spray |
|--------|-----------------------|--------------|--------------|--------------|
| 361    | HL03/94-14-3          | 5.00         | 5.00         | 3.67         |
| 362    | HL03/94-14 (1)        | 7.00         | 7.00         | 5.00         |
| 363    | HL03/94-14 (2)        | 4.00         | 3.00         | 1.00         |
| 364    | 7241/86-4 (5)         | 4.00         | 6.00         | 4.33         |
| 365    | sp//zi/you            | 3.00         | 1.00         | 2.33         |
| 366    | 88-48/lsp             | 1.00         | 4.00         | 5.00         |
| 367    | 88-48/4690 (2)        | 6.00         | 1.00         | 1.67         |
| 368    | D76-1609              | 5.00         | 1.00         | 3.00         |
| 369    | 22225/86-4 (2)        | 3.00         | 2.00         | 1.67         |
| 370    | 87-23/86-4-2          | 4.00         | 1.00         | 1.00         |
| 371    | 87-23/86-4 (1)        | 3.00         | 1.00         | 1.00         |
| 372    | 87-23/86-4 (2)        | 5.00         | 1.00         | 1.00         |
| 373    | 86-4/xiang//87-23 (2) | 4.00         | 1.00         | 1.67         |
| 374    | 86-4/Vance (4)        | 1.00         | 3.00         | 3.67         |
| 375    | tong/f (2)            | 3.00         | 1.00         | 1.67         |
| 376    | tong/f1-1             | 3.00         | 1.67         | 3.00         |
| 377    | tong/f (3)            | 7.00         | 1.00         | 2.33         |
| 378    | tong/f1-2             | 4.00         | 1.00         | 1.00         |



Table S2. (Cont.)

| S. No. | Lines                 | 2014JP–spray | 2015JP–spray | 2016JP–spray |
|--------|-----------------------|--------------|--------------|--------------|
| 379    | tong/f (4)            | 2.00         | 1.00         | 1.67         |
| 380    | (86-4/xiang) /87-23   | 4.00         | 1.00         | 1.00         |
| 381    | nannong1138-2         | 3.00         | 2.00         | 1.00         |
| 382    | 86-4/21534 (2)        | 3.00         | 2.00         | 1.67         |
| 383    | 86-4/xiang//87-23 (3) | 2.00         | 1.00         | 1.00         |
| 384    | 86-4/xiang//87-23 (4) | 7.00         | 2.00         | 3.00         |
| 385    | 86-4/xiang//87-23 (5) | 3.00         | 7.00         | 5.00         |
| 386    | 86-4/xiang//87-23 (6) | 6.00         | 7.11         | 4.00         |
| 387    | 22369/88-48-2         | 5.00         | 1.00         | 1.00         |
| 388    | 22369/88-48 (1)       | 6.00         | 1.00         | 1.00         |
| 389    | 22369/88-48 (2)       | 7.00         | 1.67         | 1.67         |
| 390    | you01-65×99-6 (1)     | 5.00         | 2.00         | 1.67         |
| 391    | 996zao                | 4.00         | 1.00         | 1.67         |
| 392    | nn99-6                | 4.00         | 1.00         | 1.67         |
| 393    | TE99-6bu              | 4.00         | 1.00         | 2.33         |
| 394    | you01-65×99-6 (2)     | 2.00         | 2.00         | 1.67         |
| 395    | you01-65×99-6 (3)     | 5.00         | 1.00         | 1.67         |
| 396    | Beeson                | 5.00         | 4.33         | 1.67         |

Table S2. (Cont.)

| S. No. | Lines                                        | 2014JP–spray | 2015JP–spray | 2016JP–spray |
|--------|----------------------------------------------|--------------|--------------|--------------|
| 397    | xiangshuidou/you 4 (1)                       | 5.00         | 3.00         | 2.33         |
| 398    | 88-48s/zheng0102                             | 2.00         | 6.78         | 3.00         |
| 399    | 88-48×Z0102                                  | 5.00         | 4.00         | 2.33         |
| 400    | zhe3/118-1                                   | 3.00         | 7.00         | 3.67         |
| 401    | (nannongdahuangdou×JN03136)<br>F1×wuxing2hao | 3.00         | 5.78         | 2.33         |
| 402    | N7241                                        | 3.00         | 1.00         | 1.00         |
| 403    | guandou2hao                                  | 3.00         | 5.00         | 2.33         |
| 404    | sp//493-1/you (2)                            | 3.00         | 5.00         | 1.00         |
| 405    | sp//493-1/y4                                 | 1.00         | 2.33         | 3.00         |
| 406    | sp× (493-1×Y4)                               | 4.00         | 3.00         | 1.00         |
| 407    | sp//86-4/you (1)                             | 5.00         | 5.33         | 3.67         |
| 408    | sp//86-4/you (2)                             | 5.00         | 6.00         | 2.33         |
| 409    | R19S×200651                                  | 1.00         | 4.22         | 2.33         |
| 410    | 96-3//you4/8831 (1)                          | 2.00         | 1.00         | 1.00         |
| 411    | Y96-3× (Y4×88-31) (2)                        | 5.00         | 1.00         | 1.00         |
| 412    | 96-3//you4/8831 (2)                          | 1.00         | 1.00         | 1.00         |
| 413    | 493-1/you                                    | 3.00         | 1.00         | 1.67         |

**Table S2. (Cont.)**

| S. No. | Lines                  | 2014JP–spray | 2015JP–spray | 2016JP–spray |
|--------|------------------------|--------------|--------------|--------------|
| 414    | 493-1/y4(gao)          | 2.00         | 7.89         | 5.00         |
| 415    | 493-1×Y4?              | 1.00         | 1.00         | 1.67         |
| 416    | liufeng/taiwan75 (2)   | 4.00         | 1.00         | 1.00         |
| 417    | liufeng/taiwan75-1     | 3.00         | 3.00         | 3.00         |
| 418    | you4/chu1 (1)          | 2.00         | 3.00         | 1.67         |
| 419    | you4/chu1 (2)          | 3.00         | 2.33         | 1.67         |
| 420    | nannong87-23           | 4.00         | 2.67         | 1.67         |
| 421    | xiangshuidou/you 4 (2) | 1.00         | 1.67         | 1.67         |
| 422    | xiang/Y4               | 5.00         | 4.33         | 1.67         |
| 423    | xiang/y4               | 1.00         | 1.00         | 1.67         |
| 424    | 86-4/you4-2            | 3.00         | 2.00         | 1.00         |
| 425    | sp//86-4/you (3)       | 5.00         | 1.00         | 1.67         |
| 426    | tong/HP1-1             | 3.00         | 5.22         | 3.67         |
| 427    | you96-4                | 1.00         | 1.00         | 1.00         |
| 428    | tong/HP                | 5.00         | 4.00         | 3.67         |
| 429    | tong/DHP-1             | 5.00         | 2.00         | 2.33         |
| 430    | tong/DHP               | 4.00         | 5.00         | 3.00         |
| 431    | tong×DHP               | 1.00         | 5.22         | 3.00         |

Table S2. (Cont.)

| S. No. | Lines                | 2014JP–spray | 2015JP–spray | 2016JP–spray |
|--------|----------------------|--------------|--------------|--------------|
| 432    | 94-16/y4(1)          | 7.00         | 1.00         | 1.67         |
| 433    | t06[tong/y4          | 3.00         | 5.00         | 3.67         |
| 434    | zao1//liufeng/you4   | 1.00         | 1.00         | 1.67         |
| 435    | zao1//liufeng/you)-2 | 3.00         | 1.00         | 3.00         |
| 436    | 94-16/p1 (5)         | 3.00         | 4.25         | 2.33         |
| 437    | 94-16/p1 (6)         | 5.00         | 2.00         | 1.67         |
| 438    | 94-16/p1 (7)         | 3.00         | 2.67         | 1.00         |
| 439    | sp//493-1/you (3)    | 4.00         | 2.00         | 1.00         |
| 440    | you4/Graham-2        | 5.00         | 1.00         | 1.67         |
| 441    | you4×L74-441         | 5.00         | 5.00         | 1.00         |
| 442    | youchu4hao           | 3.00         | 4.00         | 3.00         |
| 443    | 493-1/y4             | 1.00         | 1.00         | 1.00         |
| 444    | 493-1/you4-1         | 5.00         | 2.00         | 1.67         |
| 445    | xiang/y4(1)          | 5.00         | 1.00         | 1.67         |
| 446    | zigong/you4 (1)      | 3.00         | 1.00         | 1.67         |
| 447    | zigong/you4 (2)      | 3.00         | 2.00         | 1.00         |
| 448    | zi/you-1             | 1.00         | 4.67         | 2.33         |
| 449    | xinliuqing           | 1.00         | 1.00         | 1.67         |

**Table S2. (Cont.)**

| S. No. | Lines                 | 2014JP–spray | 2015JP–spray | 2016JP–spray |
|--------|-----------------------|--------------|--------------|--------------|
| 450    | 88-48/you             | 4.00         | 1.00         | 2.33         |
| 451    | 88-48/you4 (1)        | 4.00         | 1.22         | 1.00         |
| 452    | 88-48/you4 (2)        | 3.00         | 4.11         | 2.33         |
| 453    | an×you                | 3.00         | 1.00         | 4.33         |
| 454    | tong/you4 (1)         | 3.00         | 3.00         | 3.00         |
| 455    | tong/you4 (2)         | 5.00         | 3.67         | 1.00         |
| 456    | b23-2[94-16/HD        | 4.00         | 2.00         | 1.67         |
| 457    | TY/NT-1 (2)           | 1.00         | 5.00         | 2.33         |
| 458    | TY/NT-1 (3)           | 3.00         | 5.00         | 1.00         |
| 459    | tong/dahuapi          | 5.00         | 3.00         | 3.67         |
| 460    | 88-48/sb-f-P1 (2)     | 3.00         | 4.00         | 3.00         |
| 461    | huaidou6hao×kexin3hao | 5.00         | 7.00         | 3.67         |
| 462    | Iifu×yu               | 3.00         | 5.00         | 3.67         |
| 463    | you96-3               | 2.00         | 7.00         | 5.00         |
| 464    | you4/5545 (3)         | 3.00         | 5.00         | 2.33         |
| 465    | Y-10-05               | 3.00         | 6.00         | 3.67         |
| 466    | he95-1×peila          | 1.00         | 5.00         | 3.00         |
| 467    | he95-1                | 4.00         | 7.22         | 5.00         |

Table S2. (Cont.)

| S. No. | Lines                 | 2014JP–spray | 2015JP–spray | 2016JP–spray |
|--------|-----------------------|--------------|--------------|--------------|
| 468    | huaidou6hao×liaodou11 | 3.00         | 3.00         | 2.33         |
| 469    | meng9024×peila        | 1.00         | 4.00         | 4.33         |
| 470    | youbian30×yudou22 (1) | 1.00         | 6.22         | 4.33         |
| 471    | Y-10-02               | 1.00         | 4.67         | 2.33         |
| 472    | yudou22×peila         | 3.00         | 5.00         | 3.00         |
| 473    | 0                     | 5.00         | 5.00         | 3.00         |
| 474    | youbian30×yudou22 (2) | 1.00         | 5.00         | 3.00         |
| 475    | tongdou8hao           | 1.00         | 6.33         | 3.00         |
| 476    | JN03136×tai292        | 3.00         | 3.00         | 1.67         |

**Table S3. BLP resistance and flowering time of the soybean association panel under the natural morbidity condition.**

| S. No. | Lines                      | 2018JP–natural |    | 2018DT–natural |    |
|--------|----------------------------|----------------|----|----------------|----|
|        |                            | DI             | FT | DI             | FT |
| 1      | 94-14//chu/zhou-2          | 5.00           | 43 | 4.33           | 44 |
| 2      | 94-14//chu/zhou            | 2.33           | 57 | 5.00           | 57 |
| 3      | T119-1                     | 3.00           | 37 | 5.00           | 38 |
| 4      | tongzhoudou（cai5）          | 5.00           | 41 | 3.67           | 44 |
| 5      | xin/tong-2                 | 5.00           | 42 | 7.00           | 44 |
| 6      | tongzhoudou/tong 4219-1 B2 | 5.67           | 44 | 6.33           | 42 |
| 7      | tongzhoudou/4219-1 F2      | 5.67           | 36 | 4.33           | 40 |
| 8      | tong/f（1）                  | 5.00           | 36 | 3.00           | 37 |
| 9      | msb×T·fs                   | 4.33           | 39 | 8.00           | 39 |
| 10     | T890840                    | 3.00           | 42 | 5.67           | 43 |
| 11     | T890844                    | 7.00           | 36 | 3.00           | 41 |
| 12     | tong 4219B2-4 B2           | 5.67           | 44 | 5.00           | 46 |
| 13     | tong/ai-1                  | 7.00           | 36 | 3.00           | 38 |
| 14     | 118×tieye                  | 5.00           | 41 | 5.00           | 41 |
| 15     | 94-14×T790659-2            | 5.00           | 43 | 1.00           | 45 |
| 16     | tong/si2（1）                | 7.00           | 35 | 6.33           | 37 |
| 17     | tong/si2（2）                | 3.67           | 36 | 4.33           | 40 |

Table S3. (Cont.)

| S. No. | Lines                | 2018JP–natural |    | 2018DT–natural |    |
|--------|----------------------|----------------|----|----------------|----|
|        |                      | DI             | FT | DI             | FT |
| 18     | R19/tong (1)         | 5.67           | 36 | 1.00           | 38 |
| 19     | 86-4/fengbaimu (1)   | 1.67           | 44 | 4.33           | 46 |
| 20     | R19/tong (2)         | 1.00           | 45 | 4.33           | 47 |
| 21     | 118F6/zhou92029-2    | 5.00           | 37 | 4.00           | 41 |
| 22     | liufeng/taiwan75 (1) | 3.00           | 52 | 1.00           | 49 |
| 23     | liufeng              | 3.67           | 42 | 1.00           | 44 |
| 24     | you4/5545-1          | 9.00           | 39 | 1.00           | 40 |
| 25     | liufeng/taiwan75-2   | 4.33           | 51 | 2.33           | 51 |
| 26     | 94-16/IA2077         | 7.00           | 40 | 1.00           | 43 |
| 27     | 94-16/IA2077-5       | 5.00           | 44 | 3.00           | 44 |
| 28     | b23[94-16/HD (1)     | 4.33           | 37 | 1.00           | 41 |
| 29     | b23[94-16/HD (2)     | 5.67           | 44 | 1.00           | 43 |
| 30     | b23[94-16/HD (3)     | 5.67           | 39 | 1.00           | 40 |
| 31     | b23-1[94-16/HD       | 9.00           | 36 | 1.00           | 37 |
| 32     | 94-14                | 3.00           | 57 | 3.00           | 57 |
| 33     | 94-14/shanning111    | 5.00           | 49 | 5.00           | 47 |
| 34     | 94-16                | 1.67           | 43 | 1.00           | 47 |



Table S3. (Cont.)

| S. No. | Lines            | 2018JP–natural |    | 2018DT–natural |    |
|--------|------------------|----------------|----|----------------|----|
|        |                  | DI             | FT | DI             | FT |
| 35     | 118/jidou7 (1)   | 3.00           | 42 | 3.00           | 49 |
| 36     | 118/jidou7-3 (1) | 5.67           | 36 | 5.00           | 47 |
| 37     | 118/jidou7-1 (1) | 5.00           | 41 | 3.67           | 41 |
| 38     | 118/jidou7-3 (2) | 7.00           | 51 | 3.00           | 52 |
| 39     | 118/jidou7-2     | 1.67           | 50 | 4.33           | 50 |
| 40     | 118/jidou7 (2)   | 7.00           | 43 | 4.33           | 43 |
| 41     | 118/OT94-47-3    | 1.67           | 42 | 5.00           | 44 |
| 42     | 94-14/NJ16-67    | 1.67           | 43 | 1.67           | 40 |
| 43     | tong/tai (1)     | 7.00           | 43 | 5.67           | 44 |
| 44     | tong/tai (2)     | 3.00           | 36 | 5.67           | 38 |
| 45     | tong/tai (3)     | 4.33           | 41 | 5.67           | 41 |
| 46     | tong/tai (4)     | 7.00           | 49 | 2.33           | 51 |
| 47     | liufeng/USP-1    | 3.00           | 44 | 1.00           | 47 |
| 48     | usp/118 (1)      | 7.00           | 32 | 2.33           | 34 |
| 49     | usp/118 (2)      | 5.00           | 38 | 1.00           | 42 |
| 50     | USP//tong/chu-4  | 9.00           | 39 | 1.00           | 41 |
| 51     | chuxiu           | 3.00           | 43 | 1.00           | 41 |

Table S3. (Cont.)

| S. No. | Lines              | 2018JP–natural |    | 2018DT–natural |    |
|--------|--------------------|----------------|----|----------------|----|
|        |                    | DI             | FT | DI             | FT |
| 52     | liufeng/USP-4      | 4.33           | 45 | 1.00           | 47 |
| 53     | 118/hei26 (1)      | 4.33           | 44 | 4.33           | 44 |
| 54     | 88-48/T173 (1)     | 3.00           | 49 | 1.00           | 50 |
| 55     | liufeng/USP (1)    | 5.67           | 44 | 2.33           | 46 |
| 56     | ZS07301×shanning12 | 4.33           | 38 | 2.33           | 40 |
| 57     | liufeng/USP-2      | 5.67           | 39 | 1.00           | 39 |
| 58     | liufeng/USP (2)    | 2.33           | 42 | 2.33           | 46 |
| 59     | ai/118-3 (1)       | 1.00           | 41 | 7.00           | 44 |
| 60     | ai/118             | 1.00           | 50 | 1.00           | 47 |
| 61     | ai/118-1           | 5.00           | 38 | 3.67           | 37 |
| 62     | 94-14/2032-1 (1)   | 3.00           | 47 | 3.00           | 45 |
| 63     | 94-14/2032-1 (2)   | 4.33           | 37 | 3.67           | 36 |
| 64     | 118/hei26 (2)      | 5.67           | 44 | 5.00           | 45 |
| 65     | TY/NT-1 (1)        | 5.00           | 41 | 3.00           | 46 |
| 66     | 94-16/ji31 (1)     | 9.00           | 36 | 1.00           | 41 |
| 67     | tong/hei26-1       | 5.00           | 39 | 5.00           | 43 |
| 68     | tong/hei26         | 5.00           | 43 | 6.33           | 44 |

Table S3. (Cont.)

| S. No. | Lines               | 2018JP–natural |    | 2018DT–natural |    |
|--------|---------------------|----------------|----|----------------|----|
|        |                     | DI             | FT | DI             | FT |
| 69     | tong/hei8           | 5.00           | 44 | 1.00           | 46 |
| 70     | tong/U95-5390       | 1.00           | 39 | 1.67           | 44 |
| 71     | 86-4/huaidou2hao(4) | 1.67           | 45 | 2.33           | 47 |
| 72     | 118J7/yFR(1)        | 5.67           | 56 | 4.33           | 57 |
| 73     | 118J7/yFR(8)        | 5.67           | 37 | 3.00           | 40 |
| 74     | 118J7/yFR(2)        | 4.33           | 37 | 2.33           | 41 |
| 75     | 118J7/yFR(3)        | 4.33           | 55 | 5.00           | 46 |
| 76     | 118J7/yFR(4)        | 5.00           | 36 | 3.67           | 40 |
| 77     | 118J7/yFR(5)        | 5.67           | 47 | 3.00           | 48 |
| 78     | 118J7/yFR(6)        | 5.67           | 38 | 2.33           | 37 |
| 79     | 118J7/yFR(7)        | 1.00           | 45 | 4.33           | 47 |
| 80     | 118/hefeng35-2 (1)  | 5.00           | 38 | 4.33           | 40 |
| 81     | 118/hefeng35-2 (2)  | 1.00           | 51 | 7.00           | 50 |
| 82     | lu2/xiang//tong     | 4.33           | 35 | 2.33           | 37 |
| 83     | tong/hefeng35-1     | 1.00           | 38 | 5.00           | 41 |
| 84     | tong/hei8-2 (1)     | 2.33           | 43 | 5.67           | 44 |
| 85     | tong/hei8-2 (2)     | 2.33           | 37 | 4.33           | 38 |

Table S3. (Cont.)

| S. No. | Lines             | 2018JP–natural |    | 2018DT–natural |    |
|--------|-------------------|----------------|----|----------------|----|
|        |                   | DI             | FT | DI             | FT |
| 86     | 94-14/shanning 11 | 5.67           | 40 | 2.33           | 47 |
| 87     | 94-14/dongxin 202 | 5.67           | 41 | 7.00           | 42 |
| 88     | 94-16/N2899       | 5.00           | 42 | 2.33           | 43 |
| 89     | 94-16/N2899(1)    | 4.33           | 39 | 2.33           | 40 |
| 90     | 94-16×2899        | 5.67           | 37 | 3.00           | 35 |
| 91     | 86-4/zhongzuo (1) | 2.33           | 51 | 1.67           | 49 |
| 92     | 86-4/zhongzuo (2) | 5.00           | 43 | 2.33           | 42 |
| 93     | NIL91-1N/you4     | 1.00           | 44 | 2.33           | 46 |
| 94     | NIL91-N/you4 (1)  | 5.00           | 38 | 1.67           | 38 |
| 95     | NIL91-N/you4 (2)  | 5.67           | 45 | 4.33           | 46 |
| 96     | jinda74/NN99-10   | 2.33           | 47 | 1.00           | 47 |
| 97     | jinda74×99-10     | 4.33           | 50 | 2.33           | 50 |
| 98     | 86-4/sb (1)       | 7.00           | 62 | 2.33           | 59 |
| 99     | 7241/86-4 (1)     | 4.33           | 41 | 1.00           | 44 |
| 100    | 1138/W82          | 2.33           | 39 | 1.00           | 39 |
| 101    | TP5×1138-2-1      | 3.00           | 43 | 1.00           | 43 |
| 102    | sp//zi/you4///sp  | 3.67           | 39 | 1.67           | 38 |

Table S3. (Cont.)

| S. No. | Lines                 | 2018JP–natural |    | 2018DT–natural |    |
|--------|-----------------------|----------------|----|----------------|----|
|        |                       | DI             | FT | DI             | FT |
| 103    | dongxin3hao           | 4.33           | 39 | 1.00           | 38 |
| 104    | sb/jin74//9910        | 1.00           | 43 | 5.67           | 47 |
| 105    | you/sb-1              | 1.67           | 40 | 5.00           | 40 |
| 106    | you4/sb               | 4.33           | 38 | 4.00           | 40 |
| 107    | shanxiye×agh-5        | 3.00           | 49 | 4.33           | 50 |
| 108    | NG94-156              | 5.00           | 44 | 5.00           | 46 |
| 109    | 88-48/4690（1）         | 5.00           | 47 | 3.00           | 48 |
| 110    | 94-16/863070-D36      | 5.00           | 40 | 3.00           | 42 |
| 111    | 94-14/zhongzuo97-1121 | 3.00           | 41 | 3.67           | 45 |
| 112    | NG4690                | 3.00           | 47 | 5.00           | 46 |
| 113    | nannong86--4          | 3.67           | 49 | 1.00           | 52 |
| 114    | 86-4/huaidou2hao(3)   | 3.67           | 53 | 1.00           | 52 |
| 115    | t821058               | 3.67           | 41 | 1.00           | 41 |
| 116    | t821096               | 2.33           | 51 | 1.00           | 51 |
| 117    | T821069               | 5.00           | 46 | 1.00           | 48 |
| 118    | T821060               | 5.00           | 37 | 1.00           | 37 |
| 119    | t821082               | 1.00           | 53 | 1.00           | 51 |

Table S3. (Cont.)

| S. No. | Lines                 | 2018JP–natural |    | 2018DT–natural |    |
|--------|-----------------------|----------------|----|----------------|----|
|        |                       | DI             | FT | DI             | FT |
| 120    | 86-4/huaidou2hao(1)   | 5.00           | 42 | 1.00           | 45 |
| 121    | 86-4/huaidou2hao(2)   | 5.67           | 37 | 1.00           | 39 |
| 122    | 86-4/Dsp-2            | 3.00           | 37 | 1.00           | 42 |
| 123    | 86-4/sp               | 3.00           | 43 | 1.00           | 44 |
| 124    | 86-4/sp2 (1)          | 5.00           | 43 | 1.00           | 45 |
| 125    | 86-4/RLFI (1)         | 7.00           | 38 | 1.00           | 43 |
| 126    | 86-4/xiang//87-23 (1) | 3.00           | 40 | 1.67           | 44 |
| 127    | 493-1/you4-2          | 1.00           | 51 | 1.00           | 43 |
| 128    | 86-4/RLFI (2)         | 1.67           | 42 | 1.00           | 45 |
| 129    | 86-4/sp-2             | 3.00           | 38 | 1.00           | 40 |
| 130    | 86-4/Sp (1)           | 5.67           | 42 | 1.00           | 42 |
| 131    | 86-4/Sp (2)           | 5.00           | 46 | 1.00           | 46 |
| 132    | 86-4/sp2 (2)          | 3.00           | 41 | 1.00           | 43 |
| 133    | 86-4/tongzhoudou      | 1.00           | 46 | 3.67           | 45 |
| 134    | 7241/86-4 (2)         | 4.33           | 55 | 1.00           | 55 |
| 135    | zhe/118 (1)           | 9.00           | 37 | 1.00           | 40 |
| 136    | zhe/118-2             | 4.33           | 46 | 1.00           | 50 |

Table S3. (Cont.)

| S. No. | Lines                 | 2018JP–natural |    | 2018DT–natural |    |
|--------|-----------------------|----------------|----|----------------|----|
|        |                       | DI             | FT | DI             | FT |
| 137    | nannong87-17          | 3.67           | 44 | 4.33           | 42 |
| 138    | nannong33（nannong513） | 5.67           | 42 | 3.00           | 43 |
| 139    | 86-4/NH5              | 1.00           | 47 | 1.00           | 53 |
| 140    | 86-4/RLFI2            | 6.00           | 37 | 1.00           | 38 |
| 141    | 86-4/RIfi2-2          | 3.67           | 43 | 1.00           | 45 |
| 142    | 86-4/7424F2-19（1）     | 9.00           | 39 | 3.67           | 40 |
| 143    | 86-4/7424F2-1         | 5.00           | 42 | 1.67           | 44 |
| 144    | 86-4/7424F2-19（2）     | 1.00           | 45 | 1.00           | 47 |
| 145    | 86-4/you4（1）          | 3.00           | 37 | 1.00           | 40 |
| 146    | 88-48/AGH（1）          | 2.33           | 46 | 1.00           | 46 |
| 147    | 86-4/you4（2）          | 3.00           | 47 | 1.00           | 48 |
| 148    | 86-4/you4（3）          | 1.67           | 42 | 1.00           | 44 |
| 149    | 22225/86-4（1）         | 3.67           | 40 | 1.00           | 41 |
| 150    | H5050/86-4（1）         | 5.00           | 40 | 1.00           | 46 |
| 151    | H5050/86-4（2）         | 1.00           | 44 | 1.00           | 47 |
| 152    | tong/hefeng35（1）      | 5.00           | 37 | 1.00           | 38 |
| 153    | 90L-2/tong            | 4.33           | 42 | 1.00           | 43 |

Table S3. (Cont.)

| S. No. | Lines            | 2018JP–natural |    | 2018DT–natural |    |
|--------|------------------|----------------|----|----------------|----|
|        |                  | DI             | FT | DI             | FT |
| 154    | NN8-4/Forrest    | 3.00           | 36 | 1.00           | 37 |
| 155    | 88-48/Sp         | 3.67           | 43 | 1.00           | 42 |
| 156    | 86-4/nh5 (1)     | 4.33           | 44 | 1.00           | 48 |
| 157    | 86-4/Vance-1 (1) | 3.00           | 43 | 1.00           | 46 |
| 158    | 86-4/Vance-2     | 5.67           | 42 | 1.00           | 43 |
| 159    | 86-4/Vance (1)   | 3.00           | 47 | 1.00           | 48 |
| 160    | 86-4/Vance (2)   | 5.00           | 47 | 1.00           | 48 |
| 161    | 86-4/Vance-1 (2) | 2.33           | 46 | 3.67           | 46 |
| 162    | 86-4/Vance (3)   | 7.00           | 51 | 1.00           | 56 |
| 163    | you96-5×Vance    | 3.67           | 43 | 1.00           | 44 |
| 164    | 73-932/zao18-1   | 1.00           | 44 | 3.00           | 49 |
| 165    | 73932×zao18      | 3.67           | 45 | 3.67           | 43 |
| 166    | nannong73-935    | 5.00           | 51 | 1.00           | 54 |
| 167    | 73-932           | 5.67           | 43 | 2.33           | 44 |
| 168    | 73-935/6255 (1)  | 3.00           | 47 | 1.00           | 48 |
| 169    | 73-932/6255-2    | 9.00           | 49 | 1.00           | 53 |
| 170    | 73-935/6255 (2)  | 3.67           | 43 | 1.00           | 44 |



Table S3. (Cont.)

| S. No. | Lines                | 2018JP–natural |    | 2018DT–natural |    |
|--------|----------------------|----------------|----|----------------|----|
|        |                      | DI             | FT | DI             | FT |
| 171    | 73-935/6255 (3)      | 5.00           | 37 | 1.00           | 40 |
| 172    | 73-935×M9449         | 5.00           | 46 | 1.00           | 50 |
| 173    | 73-935×Z0102         | 5.00           | 35 | 2.33           | 37 |
| 174    | nannong493-1         | 5.67           | 29 | 2.33           | 40 |
| 175    | 8831/you4//73935 (1) | 5.00           | 39 | 1.67           | 41 |
| 176    | 8831/you4//73935 (2) | 4.33           | 44 | 3.00           | 44 |
| 177    | (Y4×88-31) ×73-935   | 3.00           | 55 | 1.00           | 56 |
| 178    | chu//nan/you-2       | 5.67           | 54 | 1.67           | 51 |
| 179    | 83-19                | 3.67           | 50 | 3.67           | 45 |
| 180    | 118/hefeng25         | 3.00           | 55 | 4.33           | 46 |
| 181    | you× (88-31×73-935)  | 1.00           | 44 | 1.00           | 46 |
| 182    | you/88-31//73-935    | 5.00           | 36 | 5.67           | 42 |
| 183    | youchun96-4/86-4 (1) | 5.00           | 35 | 1.00           | 35 |
| 184    | youchun96-4/86-4 (2) | 1.67           | 43 | 3.67           | 46 |
| 185    | youchun96-4/86-4 (3) | 3.67           | 44 | 1.00           | 45 |
| 186    | HL05                 | 4.33           | 43 | 1.67           | 50 |
| 187    | 86-4/fengbaimu (2)   | 3.00           | 52 | 1.00           | 49 |

Table S3. (Cont.)

| S. No. | Lines              | 2018JP–natural |    | 2018DT–natural |    |
|--------|--------------------|----------------|----|----------------|----|
|        |                    | DI             | FT | DI             | FT |
| 188    | 86-4/fengbaimu (3) | 5.67           | 47 | 3.67           | 45 |
| 189    | you94-412/86-4     | 5.67           | 47 | 7.00           | 51 |
| 190    | 86-4/242(1)        | 4.33           | 36 | 1.00           | 44 |
| 191    | 86-4/242(2)        | 3.00           | 38 | 1.00           | 41 |
| 192    | 86-4/242(4)        | 5.67           | 37 | 1.00           | 42 |
| 193    | 86-4/242(5)        | 5.00           | 37 | 1.00           | 38 |
| 194    | 86-4/242(8)        | 3.67           | 35 | 3.67           | 39 |
| 195    | 86-4/242(6)        | 5.67           | 42 | 1.67           | 41 |
| 196    | 86-4/242(7)        | 5.00           | 46 | 2.33           | 49 |
| 197    | 86-4/242(10)       | 5.00           | 49 | 2.33           | 51 |
| 198    | 86-4/242(12)       | 1.00           | 42 | 3.67           | 43 |
| 199    | 86-4/242(11)       | 2.33           | 39 | 3.67           | 38 |
| 200    | cs1F/86-4 (1)      | 5.00           | 43 | 1.00           | 44 |
| 201    | cs1F/86-4 (2)      | 3.00           | 37 | 4.33           | 40 |
| 202    | cs1F/86-4 (3)      | 3.67           | 42 | 1.00           | 44 |
| 203    | cs1F/86-4 (4)      | 3.00           | 37 | 1.00           | 41 |
| 204    | cs1F/86-4 (5)      | 5.67           | 37 | 1.67           | 39 |

Table S3. (Cont.)

| S. No. | Lines                  | 2018JP–natural |    | 2018DT–natural |    |
|--------|------------------------|----------------|----|----------------|----|
|        |                        | DI             | FT | DI             | FT |
| 205    | 7241/86-4 (3)          | 3.00           | 43 | 5.00           | 46 |
| 206    | 86-4/sb (2)            | 5.00           | 40 | 1.00           | 42 |
| 207    | 7241/86-4 (4)          | 3.00           | 37 | 3.67           | 36 |
| 208    | 73-935//90L-2/ye (1)   | 1.00           | 45 | 5.67           | 44 |
| 209    | 73-935//90L-2/ye (2)   | 5.67           | 53 | 6.33           | 53 |
| 210    | 73-935//90L-2/ye (3)   | 5.67           | 37 | 5.67           | 39 |
| 211    | (S/y4)F2               | 4.33           | 37 | 1.00           | 37 |
| 212    | aijiaozao              | 5.00           | 36 | 1.00           | 39 |
| 213    | aijiaozao/26201 (1)    | 5.67           | 37 | 1.00           | 39 |
| 214    | aijiaozao/26201 (2)    | 3.67           | 40 | 1.00           | 41 |
| 215    | aijiaozao/26201 (3)    | 1.67           | 51 | 1.00           | 50 |
| 216    | youchun96-4/86-4 (4)   | 5.67           | 35 | 1.00           | 37 |
| 217    | nannong502 (nannong32) | 3.00           | 38 | 1.67           | 41 |
| 218    | nannong99-10           | 5.67           | 39 | 1.00           | 41 |
| 219    | tongdou2006            | 3.67           | 39 | 1.00           | 40 |
| 220    | 86-4/xiang             | 5.00           | 42 | 2.33           | 44 |
| 221    | CT-5                   | 1.67           | 43 | 4.00           | 44 |

Table S3. (Cont.)

| S. No. | Lines                  | 2018JP–natural |    | 2018DT–natural |    |
|--------|------------------------|----------------|----|----------------|----|
|        |                        | DI             | FT | DI             | FT |
| 222    | xiangshuidou           | 4.33           | 42 | 5.00           | 44 |
| 223    | chudou1hao             | 3.00           | 49 | 1.00           | 51 |
| 224    | suxian21               | 5.67           | 40 | 1.00           | 39 |
| 225    | caidou6hao             | 4.33           | 54 | 1.00           | 53 |
| 226    | 412785-1×Y4            | 5.00           | 51 | 5.67           | 49 |
| 227    | suxian19               | 1.67           | 41 | 1.00           | 44 |
| 228    | 88-31t                 | 7.00           | 36 | 1.00           | 39 |
| 229    | ai/118-3（2）            | 2.33           | 51 | 1.67           | 48 |
| 230    | tongdou7hao            | 3.67           | 51 | 1.00           | 50 |
| 231    | nannong88-31           | 9.00           | 36 | 1.67           | 38 |
| 232    | 88-31×（88-31×4985）     | 1.67           | 44 | 1.00           | 42 |
| 233    | 88-31×（88-31×4985）bao1 | 5.00           | 45 | 1.00           | 45 |
| 234    | Y96-3×（Y4×88-31）（1）    | 3.00           | 39 | 1.00           | 41 |
| 235    | you94-412              | 1.00           | 43 | 5.67           | 44 |
| 236    | USP90-2                | 3.67           | 38 | 3.67           | 43 |
| 237    | qingpidou×N2899        | 1.67           | 42 | 3.00           | 46 |
| 238    | CS1×fengdouFS          | 5.00           | 50 | 3.67           | 49 |

Table S3. (Cont.)

| S. No. | Lines                 | 2018JP–natural |    | 2018DT–natural |    |
|--------|-----------------------|----------------|----|----------------|----|
|        |                       | DI             | FT | DI             | FT |
| 239    | CS1×yu16              | 3.00           | 48 | 5.00           | 43 |
| 240    | 88-48×P1 (1)          | 3.00           | 56 | 2.33           | 57 |
| 241    | 118/jidou4-3          | 5.00           | 39 | 1.00           | 40 |
| 242    | 118/jidou4-4          | 5.00           | 38 | 2.33           | 40 |
| 243    | 118J4/xiangyou        | 3.00           | 40 | 3.00           | 41 |
| 244    | 118/jidou7-1 (2)      | 3.67           | 39 | 3.00           | 40 |
| 245    | 118/jidou7 (3)        | 9.00           | 39 | 5.67           | 44 |
| 246    | HD/94-16              | 4.33           | 37 | 4.33           | 39 |
| 247    | V97-6490B/95C-13      | 5.00           | 37 | 1.00           | 40 |
| 248    | sp//493-1/you (1)     | 3.00           | 39 | 7.67           | 45 |
| 249    | 88-48/T173 (2)        | 5.00           | 46 | 3.00           | 50 |
| 250    | Lar.r×36118           | 4.00           | 45 | 3.67           | 45 |
| 251    | xin/tong              | 3.00           | 40 | 4.33           | 42 |
| 252    | N/(xiang / 88-48) (1) | 1.00           | 43 | 3.67           | 48 |
| 253    | N/(xiang / 88-48) (2) | 1.00           | 39 | 5.00           | 43 |
| 254    | N/(xiang/88-48)       | 4.33           | 39 | 3.00           | 44 |
| 255    | 22033×69-3            | 1.00           | 47 | 1.00           | 48 |

Table S3. (Cont.)

| S. No. | Lines             | 2018JP–natural |    | 2018DT–natural |    |
|--------|-------------------|----------------|----|----------------|----|
|        |                   | DI             | FT | DI             | FT |
| 256    | 88-48/SP          | 5.67           | 35 | 3.67           | 36 |
| 257    | nannong88-48      | 2.33           | 44 | 1.00           | 47 |
| 258    | 88-48y            | 9.00           | 37 | 1.00           | 46 |
| 259    | 88-48/sb-f-p1-1   | 3.00           | 42 | 1.00           | 44 |
| 260    | 88-48×P1 (2)      | 7.00           | 38 | 2.33           | 40 |
| 261    | 88-48/sb-f-P1 (1) | 2.33           | 49 | 2.33           | 46 |
| 262    | 88-48/sp-2        | 3.00           | 42 | 1.00           | 45 |
| 263    | 86-4/nh5 (2)      | 3.67           | 42 | 5.00           | 44 |
| 264    | 86-4/NT-1 (1)     | 7.00           | 43 | 2.33           | 44 |
| 265    | 88-48y/86-4y      | 3.00           | 41 | 4.33           | 44 |
| 266    | N//xiang/88-48    | 5.67           | 38 | 1.67           | 37 |
| 267    | 88-48/p1 p1dan-1  | 3.67           | 42 | 1.00           | 44 |
| 268    | NT-1              | 9.00           | 53 | 4.33           | 56 |
| 269    | 88-48/f (1)       | 1.00           | 42 | 1.67           | 43 |
| 270    | 88-48/f (2)       | 4.33           | 35 | 3.67           | 37 |
| 271    | 88-48/nt-1--6     | 5.00           | 43 | 6.33           | 44 |
| 272    | 88-48/agh-2       | 3.67           | 45 | 1.67           | 43 |

Table S3. (Cont.)

| S. No. | Lines                       | 2018JP–natural |    | 2018DT–natural |    |
|--------|-----------------------------|----------------|----|----------------|----|
|        |                             | DI             | FT | DI             | FT |
| 273    | Ty/88-48y-1                 | 5.00           | 35 | 3.67           | 38 |
| 274    | 88-48//xin/tong             | 7.00           | 35 | 2.33           | 36 |
| 275    | b94[88-48 yuan/94-16(1)     | 1.00           | 40 | 1.67           | 44 |
| 276    | b94[88-48 yuan/94-16(2)     | 4.33           | 36 | 4.33           | 39 |
| 277    | fendou51                    | 7.00           | 43 | 5.67           | 46 |
| 278    | kefeng1hao                  | 7.00           | 36 | 6.33           | 38 |
| 279    | fen33/94-5                  | 4.33           | 34 | 2.33           | 37 |
| 280    | 86-4/21534（1）               | 3.67           | 43 | 1.00           | 44 |
| 281    | 86-4/N21534                 | 3.00           | 43 | 1.00           | 43 |
| 282    | jidou7hao                   | 3.67           | 46 | 5.00           | 43 |
| 283    | IA2077                      | 5.67           | 41 | 1.00           | 39 |
| 284    | ZS07259×hedou12             | 7.00           | 41 | 1.00           | 42 |
| 285    | 88-48/agh-1                 | 3.00           | 37 | 3.00           | 41 |
| 286    | L65-3366-C                  | 3.67           | 38 | 2.33           | 42 |
| 287    | fuyang434×nannongcaidou5hao | 5.67           | 36 | 1.00           | 37 |
| 288    | taixingheidou               | 5.00           | 37 | 5.00           | 38 |
| 289    | jilin31                     | 3.00           | 42 | 3.00           | 43 |

Table S3. (Cont.)

| S. No. | Lines             | 2018JP–natural |    | 2018DT–natural |    |
|--------|-------------------|----------------|----|----------------|----|
|        |                   | DI             | FT | DI             | FT |
| 290    | you4/Graham       | 4.00           | 42 | 1.00           | 38 |
| 291    | B295              | 5.00           | 44 | 3.00           | 47 |
| 292    | Graham            | 4.33           | 41 | 1.00           | 41 |
| 293    | 22318×5           | 3.00           | 44 | 1.67           | 45 |
| 294    | taiwan75          | 1.67           | 45 | 1.00           | 47 |
| 295    | nannong39         | 3.67           | 42 | 1.00           | 41 |
| 296    | 73-935/6255 (4)   | 1.67           | 46 | 1.00           | 48 |
| 297    | su1dlm×agh        | 1.00           | 40 | 2.33           | 43 |
| 298    | vance             | 1.67           | 36 | 1.00           | 39 |
| 299    | zhongdou20×agh    | 7.00           | 40 | 1.67           | 40 |
| 300    | tong/hefeng35 (2) | 4.33           | 37 | 5.00           | 42 |
| 301    | shanxiye×agh-32   | 5.67           | 42 | 1.67           | 45 |
| 302    | tong/95-5390      | 4.33           | 43 | 3.67           | 43 |
| 303    | tong×95-5390      | 4.33           | 43 | 4.33           | 45 |
| 304    | zhe3/118-2-2      | 3.67           | 43 | 3.67           | 46 |
| 305    | zhe3/118-1-3      | 9.00           | 40 | 3.67           | 41 |
| 306    | zhe/118 (2)       | 5.67           | 39 | 3.67           | 41 |



Table S3. (Cont.)

| S. No. | Lines             | 2018JP–natural |    | 2018DT–natural |    |
|--------|-------------------|----------------|----|----------------|----|
|        |                   | DI             | FT | DI             | FT |
| 307    | zhe3/118          | 4.33           | 39 | 5.00           | 40 |
| 308    | zigongdongdou     | 5.00           | 45 | 1.00           | 46 |
| 309    | zhechun3hao       | 5.00           | 40 | 5.67           | 40 |
| 310    | you4/AGH          | 2.33           | 43 | 1.00           | 47 |
| 311    | 118/OT94-57-1(1)  | 7.00           | 37 | 5.00           | 39 |
| 312    | 118/hefeng35      | 2.33           | 47 | 2.33           | 47 |
| 313    | 94-16/ji31 (2)    | 3.00           | 50 | 1.00           | 48 |
| 314    | 94-14//ji/dahuapi | 5.67           | 43 | 2.33           | 47 |
| 315    | liufeng/you4      | 5.00           | 39 | 3.67           | 43 |
| 316    | 94-16/p1 (1)      | 5.67           | 42 | 1.00           | 45 |
| 317    | 94-16/p1 (2)      | 5.00           | 51 | 4.33           | 51 |
| 318    | 94-16/y4(2)       | 5.00           | 43 | 1.00           | 45 |
| 319    | 94-16/p1 (3)      | 1.67           | 41 | 3.67           | 48 |
| 320    | 94-16/p1 (4)      | 3.00           | 42 | 1.00           | 46 |
| 321    | han/you4 (1)      | 9.00           | 40 | 5.00           | 41 |
| 322    | han/you (1)       | 5.00           | 43 | 2.33           | 46 |
| 323    | han/you (2)       | 3.00           | 43 | 1.00           | 47 |

Table S3. (Cont.)

| S. No. | Lines            | 2018JP–natural |    | 2018DT–natural |    |
|--------|------------------|----------------|----|----------------|----|
|        |                  | DI             | FT | DI             | FT |
| 324    | han/you4 (2)     | 1.00           | 44 | 1.00           | 47 |
| 325    | tong/tai (5)     | 3.00           | 45 | 1.00           | 47 |
| 326    | hanyou           | 3.00           | 47 | 1.00           | 47 |
| 327    | you/chuhun       | 3.67           | 47 | 1.00           | 48 |
| 328    | heinong26        | 3.67           | 47 | 2.00           | 48 |
| 329    | NH5              | 5.00           | 44 | 2.33           | 44 |
| 330    | you4/ganyu       | 7.00           | 39 | 1.00           | 41 |
| 331    | you4/5545 (1)    | 9.00           | 38 | 1.00           | 40 |
| 332    | you4/5545 (2)    | 3.00           | 43 | 1.00           | 45 |
| 333    | y4/5545          | 3.67           | 45 | 1.00           | 48 |
| 334    | you4/88-31t-1    | 3.00           | 37 | 5.67           | 39 |
| 335    | 86-4/you4 (4)    | 7.00           | 38 | 1.00           | 39 |
| 336    | 86-4/you4 (5)    | 4.33           | 43 | 1.67           | 43 |
| 337    | zhou92029-2      | 5.00           | 42 | 5.67           | 46 |
| 338    | 118/OT94-57-1(2) | 2.33           | 45 | 2.33           | 47 |
| 339    | 118/OT94-57      | 7.00           | 45 | 5.00           | 47 |
| 340    | 88-48/87-17 (1)  | 5.00           | 42 | 1.00           | 45 |

Table S3. (Cont.)

| S. No. | Lines                  | 2018JP–natural |    | 2018DT–natural |    |
|--------|------------------------|----------------|----|----------------|----|
|        |                        | DI             | FT | DI             | FT |
| 341    | 88-48/87-17 (2)        | 4.33           | 38 | 1.00           | 39 |
| 342    | 88-48/87-17 (3)        | 4.33           | 43 | 1.00           | 45 |
| 343    | 88-48/87-17 (4)        | 5.00           | 42 | 1.67           | 45 |
| 344    | 88-48/87-17 (5)        | 5.00           | 45 | 1.00           | 50 |
| 345    | 88-48/RLFI             | 5.00           | 40 | 1.67           | 40 |
| 346    | 86-4/NT-1 (2)          | 3.67           | 37 | 4.33           | 39 |
| 347    | 86-4/NT-1 (3)          | 5.67           | 40 | 4.33           | 40 |
| 348    | 88-48/nanxiong//sb (1) | 5.00           | 44 | 5.00           | 45 |
| 349    | 88-48/nanxiong//sb (2) | 7.00           | 41 | 5.00           | 41 |
| 350    | 88-48/AGH (2)          | 2.33           | 42 | 3.00           | 44 |
| 351    | 88-48/21534            | 7.00           | 38 | 3.67           | 39 |
| 352    | 86-4/tongy             | 4.33           | 43 | 5.00           | 48 |
| 353    | qihuang1hao×TF-2       | 3.67           | 45 | 1.00           | 48 |
| 354    | (haixi×SP) ×956251     | 5.67           | 44 | 1.00           | 47 |
| 355    | 88-48/nanxiong//sb (3) | 7.00           | 39 | 6.33           | 40 |
| 356    | 88-48/nanxiong//sb (4) | 3.00           | 45 | 5.00           | 47 |
| 357    | nanxionghuangdou       | 9.00           | 39 | 4.00           | 41 |

Table S3. (Cont.)

| S. No. | Lines                    | 2018JP–natural |    | 2018DT–natural |    |
|--------|--------------------------|----------------|----|----------------|----|
|        |                          | DI             | FT | DI             | FT |
| 358    | hanchuanbayuebao         | 5.67           | 43 | 3.00           | 46 |
| 359    | 88-48/ hanchuanssd-3     | 4.33           | 41 | 5.00           | 44 |
| 360    | tongshanbaopihuangdoujia | 5.00           | 37 | 5.00           | 36 |
| 361    | HL03/94-14-3             | 5.00           | 51 | 3.67           | 52 |
| 362    | HL03/94-14 (1)           | 5.00           | 43 | 6.33           | 42 |
| 363    | HL03/94-14 (2)           | 4.33           | 37 | 3.00           | 39 |
| 364    | 7241/86-4 (5)            | 5.67           | 38 | 1.67           | 42 |
| 365    | sp//zi/you               | 5.67           | 41 | 1.00           | 39 |
| 366    | 88-48/lsp                | 2.33           | 43 | 5.00           | 44 |
| 367    | 88-48/4690 (2)           | 7.00           | 40 | 1.00           | 42 |
| 368    | D76-1609                 | 5.00           | 46 | 1.00           | 49 |
| 369    | 22225/86-4 (2)           | 4.33           | 44 | 1.00           | 46 |
| 370    | 87-23/86-4-2             | 7.00           | 37 | 1.00           | 40 |
| 371    | 87-23/86-4 (1)           | 1.00           | 53 | 1.00           | 54 |
| 372    | 87-23/86-4 (2)           | 7.00           | 37 | 1.00           | 39 |
| 373    | 86-4/xiang//87-23 (2)    | 4.33           | 42 | 1.67           | 40 |
| 374    | 86-4/Vance (4)           | 1.00           | 50 | 1.00           | 50 |

Table S3. (Cont.)

| S. No. | Lines                 | 2018JP–natural |    | 2018DT–natural |    |
|--------|-----------------------|----------------|----|----------------|----|
|        |                       | DI             | FT | DI             | FT |
| 375    | tong/f (2)            | 3.67           | 46 | 1.00           | 49 |
| 376    | tong/f1-1             | 7.00           | 40 | 1.00           | 41 |
| 377    | tong/f (3)            | 5.00           | 43 | 1.00           | 46 |
| 378    | tong/f1-2             | 3.67           | 47 | 1.00           | 46 |
| 379    | tong/f (4)            | 3.67           | 50 | 1.67           | 52 |
| 380    | (86-4/xiang) /87-23   | 6.00           | 35 | 1.00           | 37 |
| 381    | nannong1138-2         | 1.67           | 48 | 1.00           | 48 |
| 382    | 86-4/21534 (2)        | 3.00           | 42 | 1.00           | 44 |
| 383    | 86-4/xiang//87-23 (3) | 1.67           | 45 | 2.33           | 45 |
| 384    | 86-4/xiang//87-23 (4) | 5.00           | 43 | 1.00           | 45 |
| 385    | 86-4/xiang//87-23 (5) | 1.67           | 40 | 5.00           | 41 |
| 386    | 86-4/xiang//87-23 (6) | 5.00           | 44 | 2.33           | 45 |
| 387    | 22369/88-48-2         | 5.67           | 43 | 1.00           | 46 |
| 388    | 22369/88-48 (1)       | 7.00           | 45 | 1.00           | 45 |
| 389    | 22369/88-48 (2)       | 5.00           | 46 | 1.00           | 47 |
| 390    | you01-65×99-6 (1)     | 9.00           | 45 | 1.00           | 47 |
| 391    | 996zao                | 3.00           | 43 | 1.67           | 46 |

Table S3. (Cont.)

| S. No. | Lines                                     | 2018JP–natural |    | 2018DT–natural |    |
|--------|-------------------------------------------|----------------|----|----------------|----|
|        |                                           | DI             | FT | DI             | FT |
| 392    | nn99-6                                    | 3.67           | 43 | 1.00           | 46 |
| 393    | TE99-6bu                                  | 1.67           | 44 | 1.00           | 46 |
| 394    | you01-65×99-6 (2)                         | 5.67           | 38 | 2.33           | 41 |
| 395    | you01-65×99-6 (3)                         | 5.67           | 43 | 1.00           | 44 |
| 396    | Beeson                                    | 5.67           | 39 | 2.33           | 40 |
| 397    | xiangshuidou/you 4 (1)                    | 5.00           | 37 | 1.00           | 43 |
| 398    | 88-48s/zheng0102                          | 9.00           | 44 | 2.33           | 49 |
| 399    | 88-48×Z0102                               | 3.67           | 43 | 4.33           | 45 |
| 400    | zhe3/118-1                                | 5.00           | 44 | 3.67           | 44 |
| 401    | (nannongdahuangdou×JN03136) F1×wuxing2hao | 9.00           | 41 | 5.00           | 44 |
| 402    | N7241                                     | 3.33           | 43 | 1.00           | 45 |
| 403    | guandou2hao                               | 3.67           | 49 | 1.00           | 49 |
| 404    | sp//493-1/you (2)                         | 3.67           | 51 | 5.00           | 54 |
| 405    | sp//493-1/y4                              | 1.00           | 44 | 3.00           | 44 |
| 406    | sp× (493-1×Y4)                            | 3.00           | 53 | 1.67           | 55 |
| 407    | sp//86-4/you (1)                          | 5.00           | 37 | 1.00           | 36 |
| 408    | sp//86-4/you (2)                          | 5.67           | 47 | 1.67           | 50 |

Table S3. (Cont.)

| S. No. | Lines                  | 2018JP–natural |    | 2018DT–natural |    |
|--------|------------------------|----------------|----|----------------|----|
|        |                        | DI             | FT | DI             | FT |
| 409    | R19S×200651            | 3.00           | 53 | 2.33           | 54 |
| 410    | 96-3//you4/8831 (1)    | 3.67           | 50 | 1.00           | 47 |
| 411    | Y96-3× (Y4×88-31) (2)  | 5.00           | 41 | 1.00           | 43 |
| 412    | 96-3//you4/8831 (2)    | 5.67           | 41 | 1.00           | 42 |
| 413    | 493-1/you              | 4.33           | 46 | 1.00           | 45 |
| 414    | 493-1/y4(gao)          | 3.67           | 43 | 5.00           | 44 |
| 415    | 493-1×Y4?              | 4.33           | 47 | 1.00           | 48 |
| 416    | liufeng/taiwan75 (2)   | 4.33           | 53 | 1.00           | 49 |
| 417    | liufeng/taiwan75-1     | 4.33           | 42 | 1.67           | 43 |
| 418    | you4/chu1 (1)          | 5.00           | 56 | 1.67           | 52 |
| 419    | you4/chu1 (2)          | 3.00           | 41 | 1.00           | 41 |
| 420    | nannong87-23           | 5.00           | 44 | 1.00           | 46 |
| 421    | xiangshuidou/you 4 (2) | 1.00           | 53 | 1.00           | 49 |
| 422    | xiang/Y4               | 4.33           | 47 | 2.33           | 47 |
| 423    | xiang/y4               | 3.67           | 43 | 1.67           | 45 |
| 424    | 86-4/you4-2            | 5.00           | 40 | 1.00           | 43 |
| 425    | sp//86-4/you (3)       | 5.67           | 39 | 1.00           | 39 |

Table S3. (Cont.)

| S. No. | Lines                | 2018JP–natural |    | 2018DT–natural |    |
|--------|----------------------|----------------|----|----------------|----|
|        |                      | DI             | FT | DI             | FT |
| 426    | tong/HP1-1           | 2.33           | 45 | 5.00           | 46 |
| 427    | you96-4              | 2.33           | 43 | 5.67           | 47 |
| 428    | tong/HP              | 2.33           | 43 | 4.33           | 42 |
| 429    | tong/DHP-1           | 3.00           | 44 | 5.67           | 47 |
| 430    | tong/DHP             | 5.67           | 37 | 4.33           | 37 |
| 431    | tong×DHP             | 1.00           | 33 | 4.00           | 36 |
| 432    | 94-16/y4(1)          | 5.00           | 39 | 3.00           | 44 |
| 433    | t06[tong/y4          | 5.67           | 39 | 3.67           | 40 |
| 434    | zao1//liufeng/you4   | 1.00           | 36 | 1.00           | 38 |
| 435    | zao1//liufeng/you)-2 | 5.67           | 41 | 3.67           | 42 |
| 436    | 94-16/p1 (5)         | 7.00           | 37 | 1.67           | 38 |
| 437    | 94-16/p1 (6)         | 5.67           | 37 | 1.00           | 41 |
| 438    | 94-16/p1 (7)         | 5.00           | 33 | 1.00           | 42 |
| 439    | sp//493-1/you (3)    | 4.33           | 38 | 2.33           | 39 |
| 440    | you4/Graham-2        | 5.00           | 45 | 1.00           | 42 |
| 441    | you4×L74-441         | 7.00           | 43 | 1.67           | 41 |
| 442    | youchu4hao           | 3.67           | 39 | 1.00           | 39 |



Table S3. (Cont.)

| S. No. | Lines           | 2018JP–natural |    | 2018DT–natural |    |
|--------|-----------------|----------------|----|----------------|----|
|        |                 | DI             | FT | DI             | FT |
| 443    | 493-1/y4        | 3.67           | 38 | 1.00           | 37 |
| 444    | 493-1/you4-1    | 4.33           | 42 | 4.33           | 41 |
| 445    | xiang/y4(1)     | 7.00           | 39 | 1.00           | 40 |
| 446    | zigong/you4 (1) | 9.00           | 42 | 1.00           | 45 |
| 447    | zigong/you4 (2) | 9.00           | 44 | 1.00           | 46 |
| 448    | zi/you-1        | 2.33           | 55 | 1.67           | 48 |
| 449    | xinliuqing      | 3.67           | 36 | 1.00           | 35 |
| 450    | 88-48/you       | 4.33           | 41 | 2.33           | 42 |
| 451    | 88-48/you4 (1)  | 9.00           | 42 | 5.00           | 41 |
| 452    | 88-48/you4 (2)  | 4.33           | 39 | 3.00           | 38 |
| 453    | an×you          | 4.33           | 44 | 1.00           | 44 |
| 454    | tong/you4 (1)   | 1.00           | 49 | 1.00           | 47 |
| 455    | tong/you4 (2)   | 5.00           | 45 | 3.00           | 47 |
| 456    | b23-2[94-16/HD  | 5.00           | 43 | 1.67           | 43 |
| 457    | TY/NT-1 (2)     | 3.00           | 41 | 5.00           | 42 |
| 458    | TY/NT-1 (3)     | 2.33           | 48 | 3.67           | 46 |
| 459    | tong/dahuapi    | 5.67           | 44 | 4.33           | 43 |

Table S3. (Cont.)

| S. No. | Lines                 | 2018JP–natural |    | 2018DT–natural |    |
|--------|-----------------------|----------------|----|----------------|----|
|        |                       | DI             | FT | DI             | FT |
| 460    | 88-48/sb-f-P1 (2)     | 4.33           | 40 | 1.00           | 42 |
| 461    | huaidou6hao×kexin3hao | 4.33           | 45 | 3.00           | 42 |
| 462    | Iifu×yu               | 3.00           | 50 | 4.33           | 49 |
| 463    | you96-3               | 4.33           | 41 | 5.00           | 41 |
| 464    | you4/5545 (3)         | 5.00           | 43 | 6.33           | 45 |
| 465    | Y-10-05               | 1.67           | 41 | 3.67           | 45 |
| 466    | he95-1×peila          | 5.00           | 40 | 1.67           | 42 |
| 467    | he95-1                | 3.00           | 52 | 5.00           | 54 |
| 468    | huaidou6hao×liaodou11 | 9.00           | 53 | 5.00           | 54 |
| 469    | meng9024×peila        | 3.00           | 42 | 6.33           | 48 |
| 470    | youbian30×yudou22 (1) | 2.33           | 43 | 2.33           | 45 |
| 471    | Y-10-02               | 4.33           | 44 | 2.33           | 49 |
| 472    | yudou22×peila         | 5.00           | 44 | 1.00           | 44 |
| 473    | 0                     | 5.67           | 49 | 3.00           | 48 |
| 474    | youbian30×yudou22 (2) | 4.33           | 48 | 1.67           | 50 |
| 475    | tongdou8hao           | 5.00           | 37 | 1.67           | 36 |
| 476    | JN03136×tai292        | 5.00           | 37 | 1.00           | 40 |

**Table S4. Spearman correlation coefficient of flowering time and BLP resistance in the soybean association panel under the natural morbidity condition**

| Trait          | Environment    | BLP resistance |                | Flowering time |                |
|----------------|----------------|----------------|----------------|----------------|----------------|
|                |                | 2018JP–natural | 2018DT–natural | 2018JP–natural | 2018DT–natural |
| BLP resistance | 2018JP–natural | 1              |                |                |                |
|                | 2018DT–natural | 0.01           | 1              |                |                |
| Flowering time | 2018JP–natural | -0.29*         | -0.04          | 1              |                |
|                | 2018DT–natural | -0.28*         | -0.04          | 0.87*          | 1              |

\*significant at P < 0.05

**Table S5. Information on marker numbers and map lengths of different chromosome in the RIL population of soybean.**

| <b>Chromosome</b> | <b>SNP number</b> | <b>Bin number</b> | <b>Linkage distance (cM)</b> | <b>Density (SNP/cM)</b> |
|-------------------|-------------------|-------------------|------------------------------|-------------------------|
| Gm01              | 4,377             | 117               | 122.07                       | 1.04                    |
| Gm02              | 2,938             | 144               | 158.65                       | 1.1                     |
| Gm03              | 4,258             | 117               | 94.79                        | 0.81                    |
| Gm04              | 2,067             | 120               | 127.1                        | 1.06                    |
| Gm05              | 1,691             | 109               | 99.34                        | 0.91                    |
| Gm06              | 4,845             | 158               | 166.56                       | 1.05                    |
| Gm07              | 2,149             | 135               | 124.05                       | 0.92                    |
| Gm08              | 4,256             | 185               | 187.33                       | 1.01                    |
| Gm09              | 3,415             | 131               | 127.99                       | 0.98                    |
| Gm10              | 4,407             | 137               | 133.31                       | 0.97                    |
| Gm11              | 1,107             | 123               | 143.2                        | 1.16                    |
| Gm12              | 1,682             | 831               | 3.29                         | 1.24                    |
| Gm13              | 2,899             | 158               | 178.51                       | 1.13                    |
| Gm14              | 1,207             | 106               | 116.03                       | 1.09                    |
| Gm15              | 5,560             | 126               | 123.11                       | 0.98                    |
| Gm16              | 2,207             | 113               | 116.36                       | 1.03                    |
| Gm17              | 2,813             | 119               | 135.9                        | 1.14                    |

**Table S5. (Cont.)**

| <b>Chromosome</b> | <b>SNP number</b> | <b>Bin number</b> | <b>Linkage distance (cM)</b> | <b>Density (SNP/cM)</b> |
|-------------------|-------------------|-------------------|------------------------------|-------------------------|
| Gm18              | 7,704             | 165               | 130.35                       | 0.79                    |
| Gm19              | 5,374             | 114               | 133.88                       | 1.17                    |
| Gm20              | 1,721             | 140               | 108.42                       | 0.77                    |
| Total             | 66,677            | 2,600             | 2,630.24                     | 1.01                    |

**Table S6. QTNs associated with BLP resistance identified by GWAS in the soybean association panel under the artificial inoculation with Xag C5 strain**

| S. No. | SNP ID       | Chromosome | Position | $-\log_{10}P$ | $R^2(\%)$ | Environment  |
|--------|--------------|------------|----------|---------------|-----------|--------------|
| 1      | Gm05_7667820 | 5          | 7667820  | 4.06          | 3.30      | 2016JP-spray |
| 2      | Gm05_7668047 | 5          | 7668047  | 4.06          | 3.30      | 2016JP-spray |
| 3      | Gm05_7993347 | 5          | 7993347  | 4.42          | 3.65      | 2016JP-spray |
| 4      | Gm05_8004022 | 5          | 8004022  | 4.96          | 4.16      | 2016JP-spray |
| 5      | Gm05_8032322 | 5          | 8032322  | 4.64          | 3.85      | 2016JP-spray |
| 6      | Gm05_8032346 | 5          | 8032346  | 4.64          | 3.85      | 2016JP-spray |
| 7      | Gm05_8091323 | 5          | 8091323  | 5.66          | 4.85      | 2016JP-spray |
| 8      | Gm05_8107119 | 5          | 8107119  | 5.66          | 4.85      | 2016JP-spray |
| 9      | Gm05_8107147 | 5          | 8107147  | 5.66          | 4.85      | 2016JP-spray |
| 10     | Gm05_8149446 | 5          | 8149446  | 4.94          | 4.14      | 2016JP-spray |
| 11     | Gm05_8149459 | 5          | 8149459  | 4.65          | 3.86      | 2016JP-spray |
| 12     | Gm05_8162286 | 5          | 8162286  | 5.52          | 4.71      | 2016JP-spray |
| 13     | Gm05_8169971 | 5          | 8169971  | 5.52          | 4.71      | 2016JP-spray |
| 14     | Gm05_8174502 | 5          | 8174502  | 5.52          | 4.71      | 2016JP-spray |
| 15     | Gm05_8191002 | 5          | 8191002  | 5.25          | 4.44      | 2016JP-spray |
| 16     | Gm07_4368039 | 7          | 4368039  | 4.56          | 3.78      | 2014JP-spray |
| 17     | Gm08_7075530 | 8          | 7075530  | 4.02          | 3.28      | 2015JP-spray |

**Table S6. (Cont.)**

| S. No. | SNP ID        | Chromosome | Position | $-\log_{10}P$ | $R^2(\%)$ | Environment  |
|--------|---------------|------------|----------|---------------|-----------|--------------|
| 18     | Gm08_7075839  | 8          | 7075839  | 4.02          | 3.28      | 2015JP-spray |
| 19     | Gm08_7075872  | 8          | 7075872  | 4.02          | 3.28      | 2015JP-spray |
| 20     | Gm08_7075885  | 8          | 7075885  | 4.02          | 3.28      | 2015JP-spray |
| 21     | Gm09_36500790 | 9          | 36500790 | 4.12          | 3.37      | 2015JP-spray |
| 22     | Gm09_36501019 | 9          | 36501019 | 4.65          | 3.87      | 2014JP-spray |
|        |               |            |          | 4.24          | 3.48      | 2015JP-spray |
| 23     | Gm15_13703612 | 15         | 13703612 | 4.01          | 3.26      | 2016JP-spray |
| 24     | Gm15_13726816 | 15         | 13726816 | 4.07          | 3.31      | 2016JP-spray |
| 25     | Gm17_5628119  | 17         | 5628119  | 4.64          | 3.86      | 2016JP-spray |
| 26     | Gm17_5628133  | 17         | 5628133  | 4.64          | 3.86      | 2016JP-spray |
| 27     | Gm17_5658566  | 17         | 5658566  | 4.87          | 4.08      | 2016JP-spray |
| 28     | Gm17_7491104  | 17         | 7491104  | 5.76          | 4.94      | 2016JP-spray |
| 29     | Gm17_7603802  | 17         | 7603802  | 4.14          | 3.39      | 2014JP-spray |
|        |               |            |          | 4.99          | 4.20      | 2015JP-spray |
|        |               |            |          | 6.87          | 6.04      | 2016JP-spray |
| 30     | Gm17_7603992  | 17         | 7603992  | 4.14          | 3.39      | 2014JP-spray |
|        |               |            |          | 4.99          | 4.20      | 2015JP-spray |
|        |               |            |          | 6.87          | 6.04      | 2016JP-spray |

**Table S6. (Cont.)**

| S. No. | SNP ID        | Chromosome | Position | $-\log_{10}P$ | $R^2(\%)$ | Environment  |
|--------|---------------|------------|----------|---------------|-----------|--------------|
| 31     | Gm17_7604008  | 17         | 7604008  | 5.04          | 4.24      | 2016JP-spray |
| 32     | Gm17_7712768  | 17         | 7712768  | 5.13          | 4.35      | 2015JP-spray |
|        |               |            |          | 6.77          | 5.94      | 2016JP-spray |
| 33     | Gm17_7721556  | 17         | 7721556  | 4.95          | 4.17      | 2015JP-spray |
|        |               |            |          | 6.46          | 5.64      | 2016JP-spray |
| 34     | Gm17_7736150  | 17         | 7736150  | 4.33          | 3.58      | 2015JP-spray |
|        |               |            |          | 5.19          | 4.39      | 2016JP-spray |
| 35     | Gm17_7754016  | 17         | 7754016  | 4.05          | 3.30      | 2014JP-spray |
|        |               |            |          | 5.11          | 4.32      | 2015JP-spray |
|        |               |            |          | 6.66          | 5.83      | 2016JP-spray |
| 36     | Gm17_7754048  | 17         | 7754048  | 4.05          | 3.30      | 2014JP-spray |
|        |               |            |          | 5.11          | 4.32      | 2015JP-spray |
|        |               |            |          | 6.66          | 5.83      | 2016JP-spray |
| 37     | Gm19_48684769 | 19         | 48684769 | 4.06          | 3.30      | 2016JP-spray |
| 38     | Gm20_1033092  | 20         | 1033092  | 4.01          | 3.26      | 2015JP-spray |



**Table S7. QTNs associated with BLP resistance identified by GWAS in soybean association panel  
under natural morbidity condition**

| S. No. | SNP ID        | Chromosome | Position | $-\log_{10}P$ | $R^2(\%)$ | Environment    |
|--------|---------------|------------|----------|---------------|-----------|----------------|
| 1      | Gm04_7895886  | 4          | 7895886  | 4.08          | 3.30      | 2018DT–natural |
| 2      | Gm05_7667820  | 5          | 7667820  | 4.21          | 3.42      | 2018DT–natural |
| 3      | Gm05_7668047  | 5          | 7668047  | 4.21          | 3.42      | 2018DT–natural |
| 4      | Gm05_38337589 | 5          | 38337589 | 4.32          | 3.53      | 2018DT–natural |
| 5      | Gm06_2745725  | 6          | 2745725  | 4.07          | 3.29      | 2018DT–natural |
| 6      | Gm09_41273199 | 9          | 41273199 | 4.59          | 3.78      | 2018DT–natural |
| 7      | Gm09_41273321 | 9          | 41273321 | 4.31          | 3.52      | 2018DT–natural |
| 8      | Gm09_41378897 | 9          | 41378897 | 4.33          | 3.53      | 2018DT–natural |
| 9      | Gm13_11075530 | 13         | 11075530 | 4.13          | 3.31      | 2018JP–natural |
| 10     | Gm16_29211869 | 16         | 29211869 | 5.19          | 4.36      | 2018DT–natural |
| 11     | Gm16_29315504 | 16         | 29315504 | 4.86          | 4.04      | 2018DT–natural |
| 12     | Gm17_5628119  | 17         | 5628119  | 4.45          | 3.65      | 2018DT–natural |
| 13     | Gm17_5628133  | 17         | 5628133  | 4.45          | 3.65      | 2018DT–natural |
| 14     | Gm17_5939123  | 17         | 5939123  | 4.08          | 3.30      | 2018DT–natural |
| 15     | Gm17_6138216  | 17         | 6138216  | 4.23          | 3.44      | 2018DT–natural |
| 16     | Gm17_6138528  | 17         | 6138528  | 4.23          | 3.44      | 2018DT–natural |
| 17     | Gm17_7590819  | 17         | 7590819  | 5.85          | 5.00      | 2018DT–natural |

**Table S7. (Cont.)**

| S. No. | SNP ID        | Chromosome | Position | $-\log_{10}P$ | $R^2(\%)$ | Environment    |
|--------|---------------|------------|----------|---------------|-----------|----------------|
| 18     | Gm17_7603802  | 17         | 7603802  | 8.74          | 7.88      | 2018DT–natural |
| 19     | Gm17_7604008  | 17         | 7604008  | 6.76          | 5.89      | 2018DT–natural |
| 20     | Gm17_7712768  | 17         | 7712768  | 4.13          | 3.31      | 2018JP–natural |
|        |               |            |          | 8.17          | 7.30      | 2018DT–natural |
| 21     | Gm17_7721556  | 17         | 7721556  | 8.32          | 7.45      | 2018DT–natural |
| 22     | Gm17_7736150  | 17         | 7736150  | 6.68          | 5.81      | 2018DT–natural |
| 23     | Gm17_7754016  | 17         | 7754016  | 8.14          | 7.26      | 2018DT–natural |
| 24     | Gm17_7754048  | 17         | 7754048  | 8.14          | 7.26      | 2018DT–natural |
| 25     | Gm17_8782918  | 17         | 8782918  | 4.22          | 3.39      | 2018JP–natural |
| 26     | Gm17_9327571  | 17         | 9327571  | 5.71          | 4.86      | 2018DT–natural |
| 27     | Gm17_9366402  | 17         | 9366402  | 4.04          | 3.26      | 2018DT–natural |
| 28     | Gm17_9376310  | 17         | 9376310  | 4.04          | 3.26      | 2018DT–natural |
| 29     | Gm18_58342389 | 18         | 58342389 | 4.64          | 3.83      | 2018DT–natural |
| 30     | Gm20_186175   | 20         | 186175   | 4.28          | 3.49      | 2018DT–natural |
| 31     | Gm20_190799   | 20         | 190799   | 4.25          | 3.46      | 2018DT–natural |
| 32     | Gm20_41883151 | 20         | 41883151 | 4.80          | 3.94      | 2018JP–natural |
| 33     | Gm20_41883183 | 20         | 41883183 | 4.80          | 3.94      | 2018JP–natural |
| 34     | Gm20_41894159 | 20         | 41894159 | 4.80          | 3.94      | 2018JP–natural |

Table S8. Annotated genes in the genomic region 3 on chromosome 17

| Wm82.a1.v1           | Gene Start<br>(bp) | Gene End<br>(bp) | Wm82.a2.1              | Gene Name                                                                       |
|----------------------|--------------------|------------------|------------------------|---------------------------------------------------------------------------------|
| <i>Glyma17g09160</i> | 6774921            | 6778817          | <i>Glyma.17g084100</i> | N.A.                                                                            |
| <i>Glyma17g09170</i> | 6784848            | 6787877          | <i>Glyma.17g084300</i> | Calcium sensing receptor, chloroplastic-like( <i>CAS</i> )                      |
| <i>Glyma17g09180</i> | 6790554            | 6792378          | <i>Glyma.17g084400</i> | Pentatricopeptide repeat-containing protein <i>At3G48250</i> ,<br>chloroplastic |
| <i>Glyma17g09190</i> | 6794828            | 6795548          | <i>Glyma.17g084500</i> | N.A.                                                                            |
| <i>Glyma17g09200</i> | 6795624            | 6796225          | <i>Glyma.17g084600</i> | N.A.                                                                            |
| <i>Glyma17g09210</i> | 6797766            | 6802424          | <i>Glyma.17g084700</i> | Neighbor of BRCA1 gene 1 protein ( <i>NBR1</i> ) homolog                        |
| <i>Glyma17g09220</i> | 6806438            | 6807175          | <i>Glyma.17g084800</i> | N.A.                                                                            |
| <i>Glyma17g09230</i> | 6808546            | 6808724          | N.A.                   | N.A.                                                                            |
| <i>Glyma17g09240</i> | 6815890            | 6816825          | <i>Glyma.17g084900</i> | N.A.                                                                            |
| <i>Glyma17g09250</i> | 6826138            | 6828802          | <i>Glyma.17g085000</i> | L-type lectin-domain containing receptor kinase<br>S.1-like(LOC100816035)       |
| <i>Glyma17g09260</i> | 6829022            | 6832521          | <i>Glyma.17g085100</i> | Ferric reduction oxidase 8, mitochondrial-like                                  |
| <i>Glyma17g09270</i> | 6841390            | 6846524          | <i>Glyma.17g085300</i> | Dead-box ATP-dependent RNA helicase 30-like                                     |
| <i>Glyma17g09280</i> | 6847806            | 6849068          | <i>Glyma.17g085400</i> | 60S ribosomal protein L27a (LOC100305936)                                       |
| <i>Glyma17g09290</i> | 6856298            | 6861173          | <i>Glyma.17g085500</i> | Copper methylamine oxidase-like                                                 |
| <i>Glyma17g09300</i> | 6863875            | 6866024          | <i>Glyma.17g085500</i> | Copper methylamine oxidase-like                                                 |

Table S8. (Cont.)

| Wm82.a1.v1           | Gene Start | Gene End | Wm82.a2.1              | Gene Name                                                                        |
|----------------------|------------|----------|------------------------|----------------------------------------------------------------------------------|
|                      | (bp)       | (bp)     |                        |                                                                                  |
| <i>Glyma17g09310</i> | 6873898    | 6875459  | <i>Glyma.17g085600</i> | N.A.                                                                             |
| <i>Glyma17g09320</i> | 6890143    | 6893993  | <i>Glyma.17g085700</i> | Histone deacetylase ( <i>HDA16</i> )                                             |
| <i>Glyma17g09330</i> | 6894658    | 6896034  | <i>Glyma.17g085800</i> | Probable polyamine amiNopropyl transferase                                       |
| <i>Glyma17g09340</i> | 6896271    | 6896386  | <i>Glyma.17g085900</i> | N.A.                                                                             |
| <i>Glyma17g09350</i> | 6898684    | 6901436  | <i>Glyma.17g086000</i> | Dentin sialophospho protein                                                      |
| <i>Glyma17g09360</i> | 6901892    | 6902669  | <i>Glyma.17g086100</i> | N.A.                                                                             |
| <i>Glyma17g09370</i> | 6911329    | 6911582  | <i>Glyma.17g086200</i> | N.A.                                                                             |
| <i>Glyma17g09380</i> | 6927230    | 6928157  | <i>Glyma.17g086300</i> | Lateral organ boundaries ( <i>LOB</i> ) domain-containing<br>protein 25          |
| <i>Glyma17g09390</i> | 6936149    | 6937109  | <i>Glyma.17g086400</i> | Oleosin H2                                                                       |
| <i>Glyma17g09400</i> | 6937495    | 6939148  | <i>Glyma.17g086500</i> | Tryptophan amiNotransferase-related protein 2                                    |
| <i>Glyma17g09410</i> | 6954078    | 6960639  | <i>Glyma.17g086600</i> | FKBP12-interacting protein of 37 kDa                                             |
| <i>Glyma17g09420</i> | 6968155    | 6971324  | <i>Glyma.17g086800</i> | Short-chain dehydrogenase TIC 32 B, chloroplastic                                |
| <i>Glyma17g09430</i> | 6969759    | 6978455  | N.A.                   | N.A.                                                                             |
| <i>Glyma17g09440</i> | 6996816    | 7001067  | <i>Glyma.17G087000</i> | Leucine-rich repeat receptor-like serine/threonine-protein<br>kinase <i>RGI4</i> |
| <i>Glyma17g09450</i> | 7009991    | 7013398  | <i>Glyma.17G087100</i> | N.A.                                                                             |

**Table S8. (Cont.)**

| <b>Wm82.a1.v1</b>    | <b>Gene Start</b> | <b>Gene End</b> | <b>Wm82.a2.1</b>       | <b>Gene Name</b>                                              |
|----------------------|-------------------|-----------------|------------------------|---------------------------------------------------------------|
|                      | <b>(bp)</b>       | <b>(bp)</b>     |                        |                                                               |
| <i>Glyma17g09460</i> | 7023131           | 7024972         | <i>Glyma.17G087200</i> | Plant UBX domain-containing protein 10                        |
| <i>Glyma17g09470</i> | 7026742           | 7029916         | <i>Glyma.17G087300</i> | Probable apyrase 7                                            |
| <i>Glyma17g09480</i> | 7029797           | 7030508         | N.A.                   | N.A.                                                          |
| <i>Glyma17g09490</i> | 7031903           | 7034163         | <i>Glyma.17G087400</i> | CRAL-TRIO domain-containing protein C3H8.02                   |
| <i>Glyma17g09500</i> | 7036148           | 7037323         | <i>Glyma.17G087500</i> | SOUL heme-binding domain-containing protein                   |
| <i>Glyma17g09510</i> | 7041808           | 7050632         | <i>Glyma.17G087600</i> | Protein modifier OF <i>SNC1-1</i>                             |
| <i>Glyma17g09520</i> | 7060809           | 7061137         | N.A.                   | N.A.                                                          |
| <i>Glyma17g09530</i> | 7066818           | 7069403         | <i>Glyma.17G087700</i> | LRR receptor-like serine/threonine-protein kinase <i>GSO1</i> |
| <i>Glyma17g09540</i> | 7075568           | 7076836         | <i>Glyma.17G087900</i> | Protein Microrchidia 6                                        |
| <i>Glyma17g09550</i> | 7077316           | 7088589         | <i>Glyma.17G087900</i> | Protein Microrchidia 6                                        |
| <i>Glyma17g09570</i> | 7097299           | 7101389         | <i>Glyma.17G088000</i> | Cysteine-rich receptor-like protein kinase                    |
| <i>Glyma17g09580</i> | 7104637           | 7107799         | <i>Glyma.17G088100</i> | N.A.                                                          |
| <i>Glyma17g09590</i> | 7108382           | 7114066         | <i>Glyma.17G088200</i> | U3 small nucleolar ribonucleoprotein protein <i>MPP10</i>     |
| <i>Glyma17g09600</i> | 7112777           | 7113981         | N.A.                   | N.A.                                                          |
| <i>Glyma17g09610</i> | 7116739           | 7119805         | <i>Glyma.17G088300</i> | N.A.                                                          |
| <i>Glyma17g09620</i> | 7123333           | 7127569         | <i>Glyma.17G088400</i> | N.A.                                                          |

**Table S8. (Cont.)**

| <b>Wm82.a1.v1</b>    | <b>Gene Start</b> | <b>Gene End</b> | <b>Wm82.a2.1</b>       | <b>Gene Name</b>                                                             |
|----------------------|-------------------|-----------------|------------------------|------------------------------------------------------------------------------|
|                      | <b>(bp)</b>       | <b>(bp)</b>     |                        |                                                                              |
| <i>Glyma17g09630</i> | 7132241           | 7136384         | <i>Glyma.17G088500</i> | Triose phosphate/phosphate translocator, Non-green<br>plastid, chloroplastic |
| <i>Glyma17g09640</i> | 7141687           | 7143538         | <i>Glyma.17G088600</i> | Transcription factor <i>MYB98</i>                                            |
| <i>Glyma17g09650</i> | 7145595           | 7150076         | <i>Glyma.17G088700</i> | <i>GDSL</i> esterase/lipase <i>At5G62930</i>                                 |
| <i>Glyma17g09660</i> | 7154443           | 7159511         | <i>Glyma.17G088800</i> | N.A.                                                                         |
| <i>Glyma17g09670</i> | 7167136           | 7169104         | <i>Glyma.17G088900</i> | N.A.                                                                         |
| <i>Glyma17g09680</i> | 7169985           | 7171100         | <i>Glyma.17G089000</i> | Phosphate kinase ( <i>ITPK2</i> )                                            |
| <i>Glyma17g09690</i> | 7171843           | 7185888         | <i>Glyma.17G089100</i> | Transducin beta-like protein 3                                               |
| <i>Glyma17g09700</i> | 7191302           | 7202806         | <i>Glyma.17G089200</i> | Pantothenate kinase 2                                                        |
| <i>Glyma17g09710</i> | 7204307           | 7205487         | <i>Glyma.17G089300</i> | Dof zinc finger protein <i>DOF5.6</i>                                        |
| <i>Glyma17g09720</i> | 7219274           | 7223407         | <i>Glyma.17G089400</i> | Probable inactive poly [ADP-ribose] polymerase <i>SRO5</i>                   |
| <i>Glyma17g09730</i> | 7235293           | 7235563         | <i>Glyma.17G089500</i> | N.A.                                                                         |
| <i>Glyma17g09740</i> | 7241079           | 7245959         | <i>Glyma.17G089600</i> | 1-deoxy-D-xylulose 5-phosphate reductoisomerase,<br>chloroplastic            |
| <i>Glyma17g09750</i> | 7251119           | 7257374         | <i>Glyma.17G089700</i> | Peroxisomal membrane protein PEX14-like                                      |
| <i>Glyma17g09760</i> | 7262336           | 7261569         | N.A.                   | N.A.                                                                         |
| <i>Glyma17g09770</i> | 7269506           | 7272294         | <i>Glyma.17G090000</i> | Serine/threonine-protein kinase HT1-like                                     |

Table S8. (Cont.)

| Wm82.a1.v1           | Gene Start | Gene End | Wm82.a2.1              | Gene Name                                     |
|----------------------|------------|----------|------------------------|-----------------------------------------------|
|                      | (bp)       | (bp)     |                        |                                               |
| <i>Glyma17g09780</i> | 7285718    | 7286797  | <i>Glyma.17G090100</i> | CASP-like protein 4A3                         |
| <i>Glyma17g09790</i> | 7293153    | 7299668  | <i>Glyma.17G090200</i> | E3 ubiquitin-protein ligase SIS3-like         |
| <i>Glyma17g09801</i> | 7305555    | 7307649  | <i>Glyma.17G090400</i> | N.A.                                          |
| <i>Glyma17g09810</i> | 7317349    | 7318511  | <i>Glyma.17G090500</i> | ACHAETE-SCUTE TRANSCRIPTION<br>FACTOR-RELATED |
| <i>Glyma17g09820</i> | 7331150    | 7331902  | N.A.                   | N.A.                                          |
| <i>Glyma17g09830</i> | 7336111    | 7341153  | <i>Glyma.17G090600</i> | Serine/threonine-protein kinase STY13         |
| <i>Glyma17g09840</i> | 7343474    | 7345735  | <i>Glyma.17G090800</i> | Sugar efflux transporter SWEET43              |
| <i>Glyma17g09850</i> | 7348179    | 7350515  | <i>Glyma.17G090900</i> | U-box domain-containing protein 19            |
| <i>Glyma17g09860</i> | 7359895    | 7364584  | <i>Glyma.17G091000</i> | N.A.                                          |
| <i>Glyma17g09870</i> | 7374757    | 7376961  | <i>Glyma.17G091100</i> | Spermidine synthase 2                         |
| <i>Glyma17g09880</i> | 7377832    | 7380057  | <i>Glyma.17G091200</i> | N.A.                                          |
| <i>Glyma17g09890</i> | 7382613    | 7384051  | N.A.                   | N.A.                                          |
| <i>Glyma17g09900</i> | 7386583    | 7387764  | <i>Glyma.17G091300</i> | N.A.                                          |
| <i>Glyma17g09910</i> | 7390673    | 7391424  | <i>Glyma.17G091400</i> | N.A.                                          |
| <i>Glyma17g09920</i> | 7392680    | 7397877  | <i>Glyma.17G091500</i> | RNA-dependent RNA polymerase 2                |
| <i>Glyma17g09930</i> | 7398901    | 7400181  | <i>Glyma.17G091600</i> | RING-H2 finger protein ATL47                  |

**Table S8. (Cont.)**

| Wm82.a1.v1           | Gene Start | Gene End | Wm82.a2.1              | Gene Name                                                          |
|----------------------|------------|----------|------------------------|--------------------------------------------------------------------|
|                      | (bp)       | (bp)     |                        |                                                                    |
| <i>Glyma17g09940</i> | 7406532    | 7413534  | <i>Glyma.17G091700</i> | Ubiquitin-conjugating enzyme E2 4                                  |
| <i>Glyma17g09950</i> | 7418849    | 7420458  | <i>Glyma.17G091800</i> | Walls are thin 1 ( <i>WAT1</i> ) -related protein <i>At5G40230</i> |
| <i>Glyma17g09960</i> | 7423322    | 7425402  | <i>Glyma.17G091900</i> | Uncharacterized LOC100790520                                       |
| <i>Glyma17g09970</i> | 7425703    | 7431101  | <i>Glyma.17G092000</i> | Protease Do-like 9 ( <i>DEGP9</i> )                                |
| <i>Glyma17g09980</i> | 7434129    | 7437803  | <i>Glyma.17G092100</i> | Rho-related GTPase                                                 |
| <i>Glyma17g09990</i> | 7440289    | 7445234  | <i>Glyma.17G092200</i> | N.A.                                                               |
| <i>Glyma17g10000</i> | 7457627    | 7463878  | <i>Glyma.17G092300</i> | Nucleobase-ascorbate transporter 6 ( <i>NAT6</i> )                 |
| <i>Glyma17g10010</i> | 7465205    | 7469158  | <i>Glyma.17G092400</i> | Spermidine synthase-like ( <i>SPDS</i> )                           |
| <i>Glyma17g10020</i> | 7485423    | 7487055  | <i>Glyma.17G092500</i> | N.A.                                                               |
| <i>Glyma17g10030</i> | 7489954    | 7494188  | <i>Glyma.17G092600</i> | LIM domain-containing protein WLIM1                                |
| <i>Glyma17g10040</i> | 7498741    | 7501948  | <i>Glyma.17G092700</i> | Calmodulin-binding protein 60 A                                    |
| <i>Glyma17g10050</i> | 7524028    | 7526123  | <i>Glyma.17G092800</i> | Gibberellin-regulated protein 26 ( <i>GASA26</i> )                 |
| <i>Glyma17g10060</i> | 7528212    | 7534901  | <i>Glyma.17G092900</i> | Alpha-manNosidase I MNS5                                           |
| <i>Glyma17g10070</i> | 7536003    | 7538057  | <i>Glyma.17G093000</i> | Putative DNA glycosylase <i>At3G47830</i>                          |
| <i>Glyma17g10080</i> | 7542027    | 7542776  | <i>Glyma.17G093200</i> | N.A.                                                               |
| <i>Glyma17g10090</i> | 7548570    | 7553330  | <i>Glyma.17G093300</i> | N.A.                                                               |
| <i>Glyma17g10100</i> | 7558655    | 7559975  | <i>Glyma.17G093400</i> | Protein JINGUBANG                                                  |



**Table S8. (Cont.)**

| Wm82.a1.v1           | Gene Start<br>(bp) | Gene End<br>(bp) | Wm82.a2.1              | Gene Name                                                                            |
|----------------------|--------------------|------------------|------------------------|--------------------------------------------------------------------------------------|
| <i>Glyma17g10110</i> | 7569770            | 7570478          | <i>Glyma.17G093500</i> | N.A.                                                                                 |
| <i>Glyma17g10120</i> | 7572287            | 7575549          | N.A.                   | N.A.                                                                                 |
| <i>Glyma17g10130</i> | 7575891            | 7580101          | <i>Glyma.17G093600</i> | <i>E2F</i> transcription factor-like E2FE                                            |
| <i>Glyma17g10140</i> | 7582198            | 7583233          | <i>Glyma.17G093700</i> | N.A.                                                                                 |
| <i>Glyma17g10150</i> | 7586556            | 7590008          | <i>Glyma.17G093800</i> | N.A.                                                                                 |
| <i>Glyma17g10160</i> | 7590737            | 7591233          | N.A.                   | N.A.                                                                                 |
| <i>Glyma17g10170</i> | 7596412            | 7598837          | <i>Glyma.17G093900</i> | Two-component response regulator ARR5-like                                           |
| <i>Glyma17g10180</i> | 7599870            | 7603103          | N.A.                   | N.A.                                                                                 |
| <i>Glyma17g10190</i> | 7611489            | 7613101          | <i>Glyma.17G094000</i> | LisH domain-containing protein C1711.05                                              |
| <i>Glyma17g10200</i> | 7621522            | 7624014          | <i>Glyma.17G094100</i> | Microtubule-associated protein TORTIFOLIA1-like                                      |
| <i>Glyma17g10210</i> | 7627559            | 7628516          | N.A.                   | N.A.                                                                                 |
| <i>Glyma17g10220</i> | 7631411            | 7631670          | N.A.                   | N.A.                                                                                 |
| <i>Glyma17g10230</i> | 7634749            | 7637391          | <i>Glyma.17G094200</i> | N.A.                                                                                 |
| <i>Glyma17g10240</i> | 7645035            | 7653573          | <i>Glyma.17G094300</i> | Pentatricopeptide repeat-containing protein <i>At1G74850</i> ,<br>chloroplastic-like |
| <i>Glyma17g10250</i> | 7663874            | 7665962          | <i>Glyma.17G094400</i> | <i>MYB</i> transcription factor <i>MYB173</i>                                        |
| <i>Glyma17g10260</i> | 7672659            | 7673593          | <i>Glyma.17G094600</i> | N.A.                                                                                 |

**Table S8. (Cont.)**

| Wm82.a1.v1           | Gene Start | Gene End | Wm82.a2.1              | Gene Name                                            |
|----------------------|------------|----------|------------------------|------------------------------------------------------|
|                      | (bp)       | (bp)     |                        |                                                      |
| <i>Glyma17g10270</i> | 7674424    | 7678675  | <i>Glyma.17G094700</i> | Serine/threonine-protein kinase AtPK2/AtPK19-like    |
| <i>Glyma17g10280</i> | 7680661    | 7702277  | <i>Glyma.17G094800</i> | Transportin <i>MOS14</i>                             |
| <i>Glyma17g10290</i> | 7707794    | 7711352  | <i>Glyma.17G095000</i> | Transcription factor bHLH79-like                     |
| <i>Glyma17g10300</i> | 7712542    | 7713696  | <i>Glyma.17G095100</i> | N.A.                                                 |
| <i>Glyma17g10310</i> | 7727276    | 7727384  | N.A.                   | N.A.                                                 |
| <i>Glyma17g10320</i> | 7727800    | 7729329  | <i>Glyma.17G095200</i> | N.V.                                                 |
| <i>Glyma17g10330</i> | 7732414    | 7736034  | <i>Glyma.17G095300</i> | Hydroxyproline O-galactosyltransferase GALT6         |
| <i>Glyma17g10340</i> | 7737006    | 7737797  | <i>Glyma.17G095400</i> | 60S ribosome subunit biogenesis protein NIP7 homolog |
| <i>Glyma17g10350</i> | 7741539    | 7743299  | <i>Glyma.17G095500</i> | AAA-ATPase <i>At3G28580</i>                          |
| <i>Glyma17g10360</i> | 7744740    | 7753192  | N.A.                   | N.A.                                                 |

Table S9. Primer sequences used in the present study.

| Gene                   | Function                                                                    | Primer Name <sup>a</sup>   | Primer Sequence (5'–3')      |
|------------------------|-----------------------------------------------------------------------------|----------------------------|------------------------------|
| <i>Glyma.17G090100</i> | CASP-like protein 4A3                                                       | Gm17G090100-qPCR-F1        | CGGTGGTGCCGAAGAGAGAA         |
|                        |                                                                             | <b>Gm17G090100-qPCR-F2</b> | <b>GGTGGTGCCGAAGAGAGAAA</b>  |
|                        |                                                                             | Gm17G090100-qPCR-R1        | CGCTCCAACCACGAGTTTTG         |
|                        |                                                                             | <b>Gm17G090100-qPCR-R2</b> | <b>AATCACCGCTCCAACCACGA</b>  |
| <i>Glyma.17G090200</i> | E3 ubiquitin-protein ligase<br><br>SIS3 isoform X1                          | <b>Gm17G090200-qPCR-F1</b> | <b>TGGTTCAGCAGTGCCAAGAAC</b> |
|                        |                                                                             | Gm17G090200-qPCR-F2        | AACTGTTTGCCTGAAGTGGG         |
|                        |                                                                             | <b>Gm17G090200-qPCR-R1</b> | <b>CCAGAGACATGCAAGCAATG</b>  |
|                        |                                                                             | Gm17G090200-qPCR-R2        | AACCACTTCCCCAGAGACAT         |
| <i>Glyma.17G090400</i> | serine/threonine kinase ;<br><br>Calcium-dependent protein<br><br>kinase 15 | Gm17G090400-qPCR-F1        | GTGAGCTTTTCGACCGGATC         |
|                        |                                                                             | <b>Gm17G090400-qPCR-F2</b> | <b>AGCTTTTCGACCGGATCATC</b>  |
|                        |                                                                             | <b>Gm17G090400-qPCR-R1</b> | <b>TCCCATGGTGTGGCAATCGTG</b> |
|                        |                                                                             | Gm17G090400-qPCR-R2        | ACTCCCATGGTGTGGCAATCG        |
| <i>Glyma.17G086300</i> | Lateral organ boundaries<br>(LOB) domain-containing<br>protein 25           | <b>Gm17G086300-qPCR-F1</b> | <b>TTACACTGACATCACTCCAG</b>  |
|                        |                                                                             | Gm17G086300-qPCR-F2        | AACTGACATCACTCCAGCA          |
|                        |                                                                             | Gm17G086300-qPCR-R1        | CACTAAACTGCCTCTGGGGA         |
|                        |                                                                             | <b>Gm17G086300-qPCR-R2</b> | <b>ATCTTGCACTAAACTGCCTC</b>  |
| <i>Glyma.05G040500</i> | Lateral organ boundaries<br>(LOB) domain-containing<br>protein 25           | Gm05G040500-qPCR-F1        | GAATCTAGAACTGCTTACAG         |
|                        |                                                                             | <b>Gm05G040500-qPCR-F2</b> | <b>CTTACAGAAGAACTTGTGGG</b>  |
|                        |                                                                             | <b>Gm05G040500-qPCR-R1</b> | <b>CCCTGCACTAGAAAGATTGG</b>  |

**Table S9. (Cont.)**

| Gene | Function | Primer Name <sup>a</sup> | Primer Sequence (5'–3') |
|------|----------|--------------------------|-------------------------|
|      |          | Gm05G040500-qPCR-R2      | TGTAAGAGCTGGATGATGCC    |

<sup>a</sup>The best primer pair for qPCR of each gene.

Table S10. The optimized qPCR conditions for the five candidate BLP resistance genes in soybean.

| Gene Name              | Primer Pair <sup>a</sup>                            | Amplicon   | Optimal T <sub>m</sub> | Optimal Primer | cDNA                | <i>R</i> <sup>2</sup> | E (%) <sup>c</sup> |
|------------------------|-----------------------------------------------------|------------|------------------------|----------------|---------------------|-----------------------|--------------------|
|                        |                                                     | Length     | (°C) <sup>b</sup>      | Concentration  | Dilution            |                       |                    |
|                        |                                                     | (bp)       |                        | (mM)           |                     |                       |                    |
| <i>Glyma.17G090100</i> | Gm17G090100-qPCR-F1/<br>Gm17G090100-qPCR-R1         | 123        | 62.7                   | 350            | 1/10 - 1/80         | 0.8292                | 132.31             |
|                        | Gm17G090100-qPCR-F1/<br>Gm17G090100-qPCR-R2         | 129        | 62.7                   | 350            | 1/10 - 1/40         | 0.9766                | 137.41             |
|                        | Gm17G090100-qPCR-F2/<br>Gm17G090100-qPCR-R1         | 122        | 62.7                   | 400            | 1/10 - 1/160        | 0.9639                | 105.50             |
|                        | <b>Gm17G090100-qPCR-F2/<br/>Gm17G090100-qPCR-R2</b> | <b>128</b> | <b>62.7</b>            | <b>350</b>     | <b>1/10 - 1/80</b>  | <b>0.9885</b>         | <b>103.96</b>      |
|                        | <b>Gm17G090200-qPCR-F1/<br/>Gm17G090200-qPCR-R1</b> | <b>112</b> | <b>62.7</b>            | <b>400</b>     | <b>1/20 - 1/160</b> | <b>0.9996</b>         | <b>100.74</b>      |
|                        | Gm17G090200-qPCR-F1/<br>Gm17G090200-qPCR-R2         | 122        | 62.7                   | 400            | 1/10 - 1/40         | 0.9998                | 113.3              |
|                        | Gm17G090200-qPCR-F2/<br>Gm17G090200-qPCR-R1         | 94         | 62.7                   | 350            | 1/40 - 1/160        | 0.9958                | 103.34             |
|                        | Gm17G090200-qPCR-F2/<br>Gm17G090200-qPCR-R2         | 104        | 62.7                   | 400            | 1/10 - 1/160        | 0.9707                | 103.83             |

Table S10. (Cont.)

| Gene Name              | Primer Pair <sup>a</sup>                            | Amplicon    | Optimal                          | Optimal Primer        | cDNA               | <i>R</i> <sup>2</sup> | E (%) <sup>c</sup> |
|------------------------|-----------------------------------------------------|-------------|----------------------------------|-----------------------|--------------------|-----------------------|--------------------|
|                        |                                                     | Length (bp) | T <sub>m</sub> (°C) <sup>b</sup> | Concentration<br>(mM) | Dilution           |                       |                    |
| <i>Glyma.17G090400</i> | Gm17G090400-qPCR-F1/<br>Gm17G090400-qPCR-R1         | 107         | 62.7                             | 350                   | 1/40 - 1/160       | 0.9057                | 112.14             |
|                        | Gm17G090400-qPCR-F1/<br>Gm17G090400-qPCR-R2         | 109         | 62.7                             | 400                   | 1/10 - 1/40        | 0.9985                | 109.6              |
|                        | <b>Gm17G090400-qPCR-F2/<br/>Gm17G090400-qPCR-R1</b> | <b>104</b>  | <b>62.7</b>                      | <b>350</b>            | <b>1/10 - 1/80</b> | <b>0.9966</b>         | <b>103.24</b>      |
|                        | Gm17G090400-qPCR-F2/<br>Gm17G090400-qPCR-R2         | 106         | 62.7                             | 350                   | 1/10 - 1/160       | 0.9713                | 104.43             |
|                        | Gm17G086300-qPCR-F1/<br>Gm17G086300-qPCR-R1         | 112         | 60.6                             | 300                   | 1/10 - 1/80        | 94.87                 | 112.8              |
|                        | <b>Gm17G086300-qPCR-F1/<br/>Gm17G086300-qPCR-R2</b> | <b>120</b>  | <b>60.6</b>                      | <b>350</b>            | <b>1/10 - 1/40</b> | <b>99.9</b>           | <b>107.3</b>       |
| <i>Glyma.17G086300</i> | Gm17G086300-qPCR-F2/<br>Gm17G086300-qPCR-R1         | 110         | 60.6                             | 250                   | 1/10 - 1/80        | 63.53                 | 152.5              |
|                        | Gm17G086300-qPCR-F2/<br>Gm17G086300-qPCR-R2         | 118         | 60.6                             | 400                   | 1/10 - 1/80        | 56.89                 | 179.09             |
|                        | Gm05G040500-qPCR-F1/<br>Gm05G040500-qPCR-R1         | 88          | -                                | -                     | -                  | -                     | -                  |
|                        | Gm05G040500-qPCR-F1/<br>Gm05G040500-qPCR-R2         | 105         | -                                | -                     | -                  | -                     | -                  |
|                        | <b>Gm05G040500-qPCR-F2/<br/>Gm05G040500-qPCR-R1</b> | <b>75</b>   | <b>60.6</b>                      | <b>400</b>            | <b>2/5 - 1/10</b>  | <b>99.79</b>          | <b>100.46</b>      |
|                        |                                                     |             |                                  |                       |                    |                       |                    |

Table S10. (Cont.)

| Gene Name | Primer Pair <sup>a</sup>                    | Amplicon    | Optimal                          | Optimal Primer | cDNA       | <i>R</i> <sup>2</sup> | E (%) <sup>c</sup> |
|-----------|---------------------------------------------|-------------|----------------------------------|----------------|------------|-----------------------|--------------------|
|           |                                             | Length (bp) | T <sub>m</sub> (°C) <sup>b</sup> | Concentration  | Dilution   |                       |                    |
|           |                                             |             |                                  | (mM)           |            |                       |                    |
|           | Gm05G040500-qPCR-F2/<br>Gm05G040500-qPCR-R2 | 92          | 60.6                             | 400            | 2/5 - 1/10 | 99.59                 | 108.77             |

<sup>a</sup>The best primer pair for each gene was in bold. <sup>b</sup>T<sub>m</sub>, annealing temperature. <sup>c</sup>E (%), efficiency.

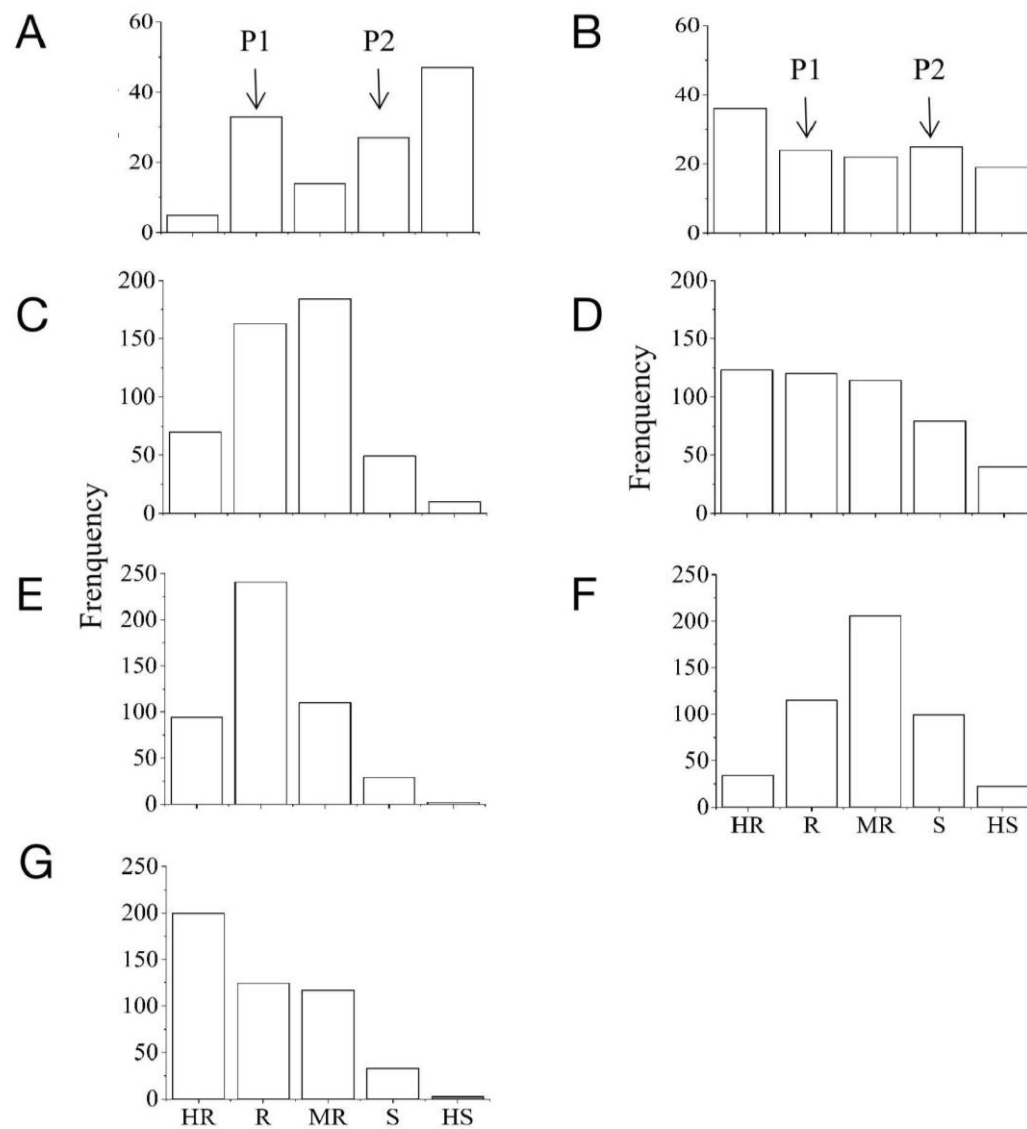

**Figure S1. Frequency distribution of phenotypic traits of a soybean RIL population and an association panel of soybean breeding lines resistance to BLP disease in soybean. (A-B)** the frequency distribution of phenotypic traits of the RIL population under the artificial inoculation condition in 2014 and 2015, respectively, and the disease resistance levels of the parents Meng8206 (P1) and Tongshan (P2) were denoted by arrows. **(C-E)** the frequency distribution of phenotypic traits of association panel lines under the artificial inoculation in 2014-2016, respectively. **(F-G)** the frequency distribution of phenotypic traits of association panel lines under the natural morbidity condition in 2018 in Jiangpu and Dangtu, respectively. HR, highly resistant; R, resistant; MR, medium resistant; HS, highly susceptible; S,



susceptible.
